1 **Genomic variations in SARS-CoV-2 genomes from Gujarat: Underlying role of variants in**  
2 **disease epidemiology**

3 Madhvi Joshi<sup>1</sup>, Apurvasinh Puvar<sup>1</sup>, Dinesh Kumar<sup>1</sup>, Afzal Ansari<sup>1</sup>, Maharshi Pandya<sup>1</sup>, Janvi  
4 Raval<sup>1</sup>, Zarna Patel<sup>1</sup>, Pinal Trivedi<sup>1</sup>, Monika Gandhi<sup>1</sup>, Labdhi Pandya<sup>1</sup>, Komal Patel<sup>1</sup>, Nitin  
5 Savaliya<sup>1</sup>, Snehal Bagatharia<sup>2</sup>, Sachin Kumar<sup>3</sup>, Chaitanya Joshi<sup>1\*</sup>

6 <sup>1</sup>Gujarat Biotechnology Research Centre (GBRC), Department of Science and Technology (DST),  
7 6th Floor, MS Building, Gandhinagar, Gujarat, India – 382011

8 <sup>2</sup>Gujarat State Biotechnology Mission, Block-11, 9<sup>th</sup> Floor, Udhog Bhavan, Sector-11,  
9 Gandhinagar, Gujarat, India – 382011

10 <sup>3</sup>Indian Institute of Technology Guwahati, Surjyamukhi Road, North, Amingaon, Guwahati,  
11 Assam, India-781039

12 \*Corresponding author email: [dir-gbrc@gujarat.gov.in](mailto:dir-gbrc@gujarat.gov.in)

13 **Abstract:**

14 Humanity has seen numerous pandemics during its course of evolution. The list includes many  
15 such as measles, Ebola, SARS, MERS, etc. Latest edition to this pandemic list is COVID-19,  
16 caused by the novel coronavirus, SARS-CoV-2. As of 4th July 2020, COVID-19 has affected over  
17 10 million people from 170+ countries, and 5,28,364 deaths. Genomic technologies have enabled  
18 us to understand the genomic constitution of the pathogens, their virulence, evolution, rate of  
19 mutations, etc. To date, more than 60,000 virus genomes have been deposited in the public  
20 depositories like GISAID and NCBI. While we are writing this, India is the 3rd most-affected  
21 country with COVID-19 with 0.6 million cases, and >18000 deaths. Gujarat is the fourth highest  
22 affected state with 5.44 percent death rate compared to national average of 2.8 percent.

23 Here, 361 SARS-CoV-2 genomes from across Gujarat have been sequenced and analyzed in order  
24 to understand its phylogenetic distribution and variants against global and national sequences.  
25 Further, variants were analyzed from diseased and recovered patients from Gujarat and the World  
26 to understand its role in pathogenesis. From missense mutations, found from Gujarat SARS-CoV-  
27 2 genomes, C28854T, deleterious mutation in nucleocapsid (N) gene was found to be significantly  
28 associated with mortality in patients. The other significant deleterious variant found in diseased  
29 patients from Gujarat and the world is G25563T, which is located in Orf3a and has a potential role

30 in viral pathogenesis. SARS-CoV-2 genomes from Gujarat are forming distinct cluster under GH  
31 clade of GISAID.

32 **Keywords:** Genomic surveillance, Viral epidemiology SARS-CoV-2, COVID-19, Mutation  
33 analysis

## 34 **Introduction**

35 As per the recent situation report-166 released by the World Health Organisation (WHO), as  
36 accessed on 4<sup>th</sup> July 2020, total confirmed positive cases of COVID-19 across the globe are  
37 10,922,324 resulting in 5,23,011 deaths. In many countries like China, Spain, Australia, Japan,  
38 South Korea, and USA, the second wave of SARS-CoV-2 infections has started (**Xu and Li 2020;**  
39 **Leung et al. 2020; Strzelecki 2020; Trade et al. 2020**). India is the third most affected country  
40 by COVID-19 after the USA and Brazil, with 6,48,315 cases and 18,655 deaths, respectively.  
41 Gujarat, located in the western part of India, is the fourth highest affected state in the world, with  
42 36,123 cases and 1944 deaths. However, the death rate is 5.44%, which is almost two times higher  
43 than national average, with a recovery rate of 71.69% in the state of Gujarat, India. Therefore,  
44 understanding the pathogen evolution and virulence through genome sequencing will be key to  
45 understanding its diversity, variation and its effect on pathogenesis and disease severity. Global  
46 depositories like GISAID and NCBI databases are flooded with SARS-CoV-2 genomes with an  
47 average of 306 genomes per day being added from across the globe. SARS-CoV-2 genome size is  
48 29 to 30.6 kb. The genome includes 10 genes which encode four structural and 16 non-structural  
49 proteins. Structural proteins are encoded by the four structural genes, including spike (S), envelope  
50 (E), membrane (M) and nucleocapsid (N) genes. The ORF1ab is the largest gene in SARS-CoV-  
51 2, which encodes the pp1ab protein and 15 non-structural proteins (nsps). The ORF1a gene  
52 encodes for pp1a protein, which also contains 10 nsps (**Shereen et al. 2020; Du et al. 2009**).

53 In the present study, the whole genome of 361 SARS-CoV-2 from Gujarat have been sequenced  
54 and analyzed against 792 SARS-CoV-2 genomes across the globe, with the known patient status.  
55 The overall dataset comprises 277 confirmed positive COVID-19 patients, which included 100  
56 females and 177 male patients. These genomes were studied against a total of 57,043 complete  
57 viral genome sequences as accessed on 4<sup>th</sup> July 2020 to characterize their clades and variants  
58 distribution. Further statistical tools were applied to understand the differences in the variants with  
59 respect to disease epidemiology. In absence of the clinically approved drugs, vaccine, and possible  
60 therapy in treating COVID-19, tracking pathogen evolution through whole genome sequencing  
61 can be a very good tool in understanding the progression of pandemic locally as well as globally.

62 This will also help in devising strategies for vaccine development, potential drug targets and host-  
63 pathogen interactions.

## 64 **Results**

65 Samples were collected on the basis of COVID-19 incidence rate from across Gujarat from 13  
66 different originating labs representing a total of 38 geographical locations from 18 districts of  
67 Gujarat, India **Supplemental Table 01**. The geographical distribution of the top three locations of  
68 viral isolates are represented by Ahmedabad (n=125), Surat (n=65), and Vadodara (n=53). Total  
69 361 viral genomes from 277 patients have been sequenced in the study from which 132 were from  
70 females while 229 were from males. These patients were from 1 year to 86 years of age group with  
71 an average age of 47.80 yrs. Most of the COVID-19 positive patients had the symptoms of fever,  
72 diarrhoea, cough and breathing problems while some of them had the comorbid condition like  
73 hypertension and diabetes etc. The final outcome of these patients were classified as deceased,  
74 recovered, hospitalized or unknown status for further data analysis based on the available metadata  
75 information. These details are presented in **Supplemental Table S2**. Similarly, a data set of around  
76 57,043 complete genomes of SARS-CoV-2 (up to 4<sup>th</sup> July, 2020) downloaded from GISAID server  
77 and classified as per the patient status mentioned above. Chi-square test was performed to test the  
78 effect of gender and age group for Gujarat and global dataset. The female patients (at *p-value*  
79 0.0240) in Gujarat dataset were observed to be at significantly higher death rate as compared to  
80 global dataset in deceased and recovered patients. The genomic dataset was further divided into  
81 different age groups of up to 40, 41-60 and over 60 years. The results indicated a significantly  
82 higher mortality rate at the age groups of 41-60 (at *p-value* 0.0391) and over 60 years in Gujarat  
83 (at *p-value* of 0.3932) compared against age groups in the global dataset. Mutation frequency  
84 profile of the Gujarat genome with the mutation spectrum is highlighted in **Figure 1**. including  
85 synonymous and missense mutations.

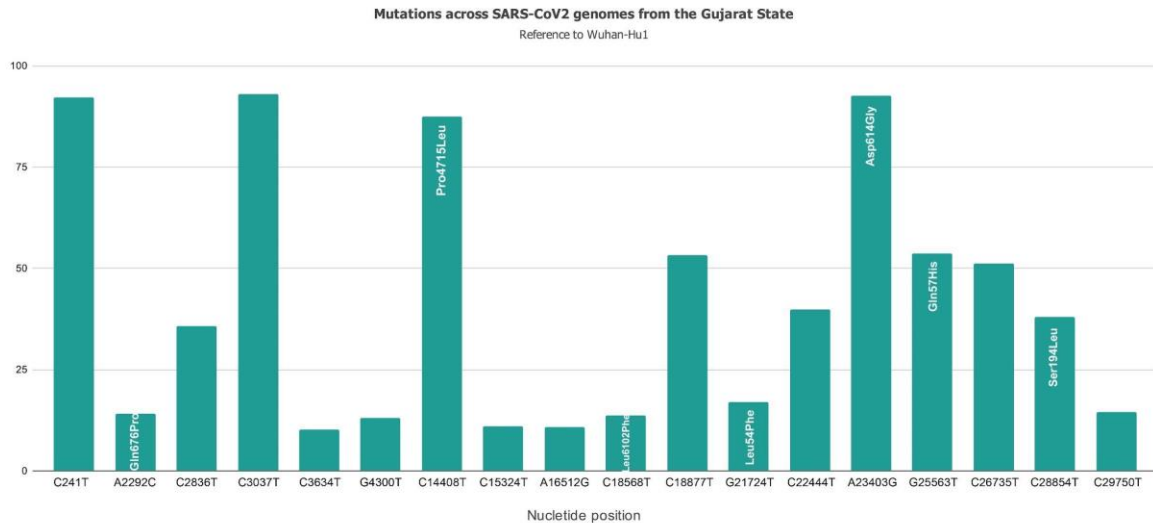

86

87 **Figure 1:** Mutation spectrum profile of 361 SARS-CoV-2 genome isolates sampled from 38  
88 locations representing 18 districts of Gujarat, India including synonymous and missense mutation.  
89 The top mutations included C241T, C3037T, C14408T/Pro314Leu, C18877T,  
90 A23403G/Asp614Gly, G25563T/Gln57His and C26735T with frequency >50%.

91 **Genome sequencing:** From a total of 277 patients, 84 had mixed infections. Mixed infections  
92 were judged by frequency of heterozygous mutations. Heterozygous mutation was considered only  
93 if it was supported by forward and reverse reads of an amplicon and 168 viral genomes were  
94 classified as two different haplotypes from 84 patients, and were observed with heterozygous allele  
95 frequencies and were manually divided in two genomes annotated with suffix “a” and “b”. All  
96 major alleles having read frequency ranging from 60 to 80 percent were included in “a” haplotypes  
97 while minor alleles having read frequency ranging from 20 to 40 percent were included in “b”  
98 haplotypes. Details of the reads, average coverage, mean read length, consensus genome length is  
99 provided in **Supplemental Table S2**.

100 **Phylogeny analysis:** Phylogenetic analysis of 361 genomes were done as per the definitions of  
101 the PANGOLIN lineage and GISAID clades. The overall lineages distribution highlighted the  
102 dominant occurrence of B.1.36 (n=184), B.1 (n=143), A (n=14), B.6 (n=12), B.1.1 (n=5), B (n=3);  
103 while clade distribution highlights the dominant prevalence of GH (n=187), G (n=139), O (n=17),  
104 S (n=13), GR (n=4) and L (n=1) as mentioned in **Supplemental Table S3**. While none of the  
105 genomes from Gujarat belonged to clade V. In the global perspective, the distribution of the  
106 GISAID clades as on 4<sup>th</sup> July 2020, from a total of 57,043 complete viral genome sequences,  
107 indicate the dominance of GR clade (n=15,784), G clade (n=12,541), GH clade (n=11,458), S  
108 clade (n=3,863), L clade (n=3,401), and V clade (n=3,640), where the “n” is the number of

109 genomes. Maximum likelihood time-resolved phylogeny tree **Figure 2** using the TreeTime  
110 pipeline and Augur bioinformatics pipeline, annotated and visualized in the FigTree (**Rambaut et**  
111 **al., 2018; Hadfield et al. 2018**). Similarly, genomes classified into GISAID clades across the  
112 globe, and Gujarat are highlighted in **Figure 3**.

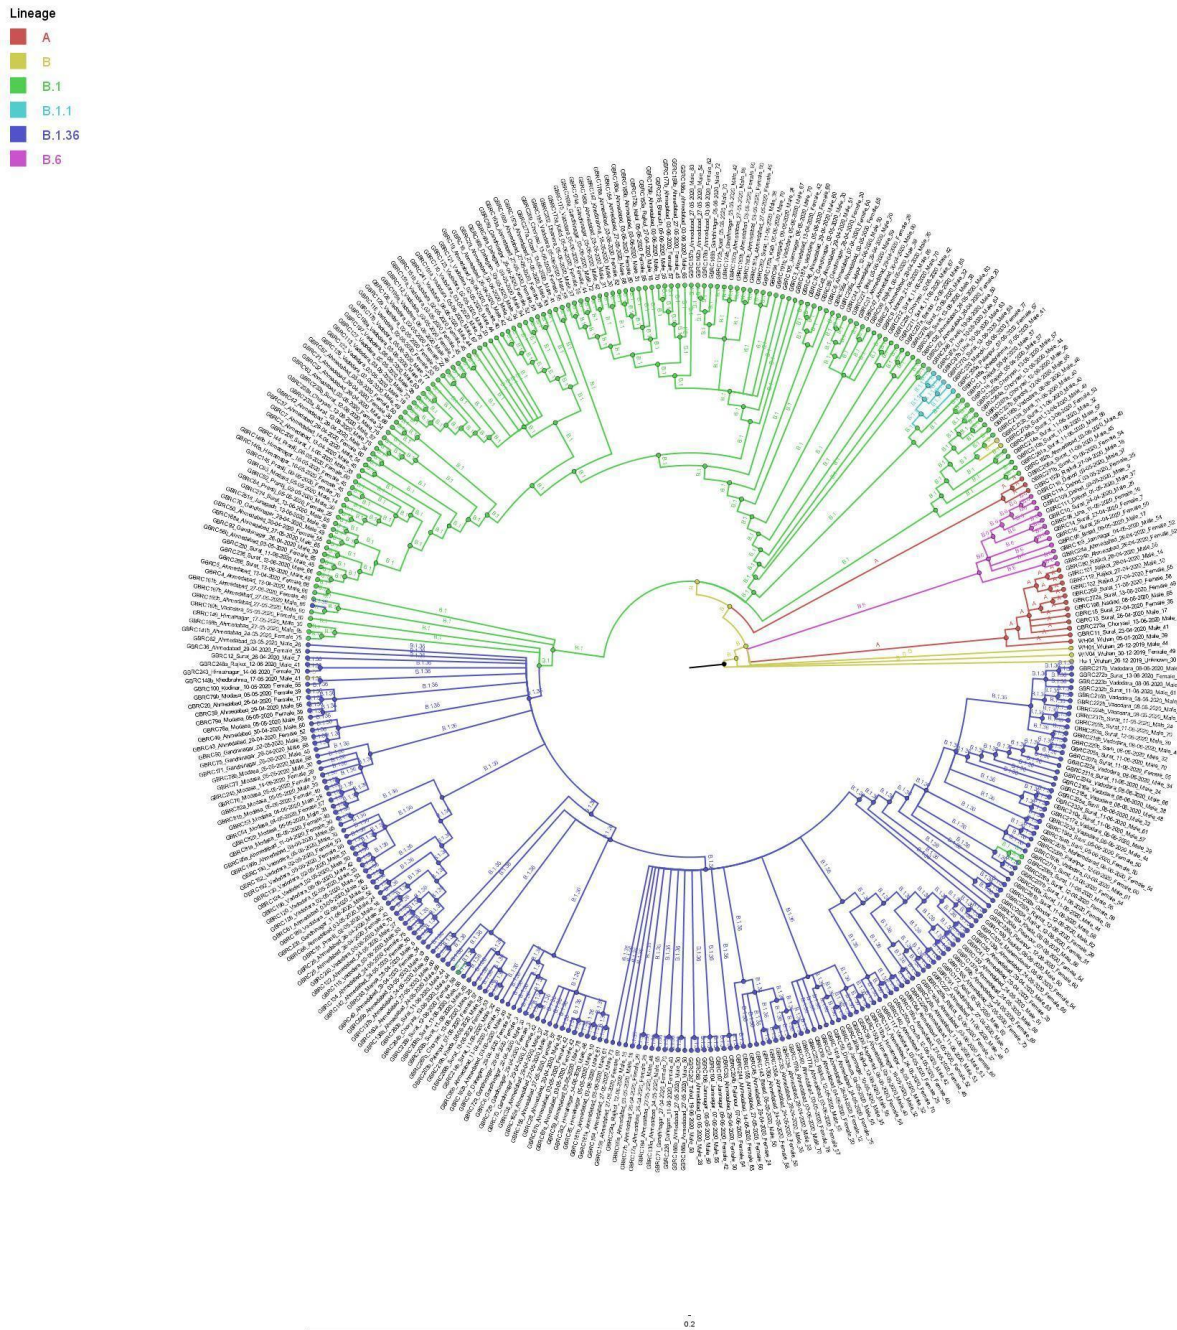

113  
114 **Figure 2:** Phylogenetic distribution of lineage from 361 SARS-CoV-2 viral genomes of Gujarat,  
115 India with reference to the Wuhan/Hu-1/2019 (EPI\_ISL\_402125).



Distribution of GISAID Clades over the continents vs Gujarat

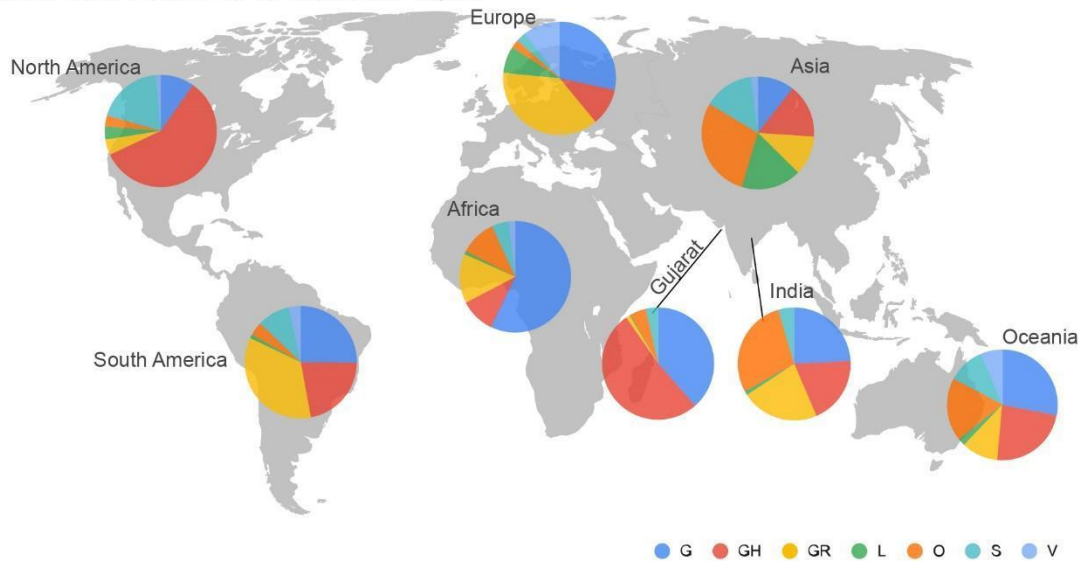

116

117 **Figure 3:** Distribution of the GISAID clades of the global genomes and Gujarat dataset as on 4th  
118 July 2020. Majority of the genomes from Gujarat cluster is dominated by prevalence of GH  
119 (n=187) and G (n=139) clades.

120 **Comparative analysis of mutation profile in SARS-CoV-2 genomes:** To understand the  
121 significance of the mutations in the SARS-CoV-2 genome isolates from Gujarat, India we have  
122 analyzed and compared the mutation profile of the 361 viral isolates from Gujarat along with the  
123 global dataset obtained from GISAID with the known patient status of 753 viral genomes and 974  
124 Indian genomes (unknown status). The bar chart displaying the comparative mutation analysis is  
125 represented as **Figure 4** displaying most frequently mutated regions on Gujarat SARS-CoV-2  
126 genomes is described as in total, 23,711 mutations were observed in global sequences (n=57,043)  
127 of SARS-CoV-2 from GISAID where in 2,191 mutations were observed from 974 Indian isolates  
128 while 519 mutations were observed in genomes sequenced from Gujarat (n=361). Out of which 91  
129 mutations were novel to Gujarat and 889 were novel to Indian genomes. A Venn diagram depicting  
130 mutations shared between sequences from Global, Indian and Gujarat isolates is given **Figure 5**.  
131 Similarly, comparison of the mutation profile analysis with *p-value* significance, frequency >5%,  
132 absolute count of the number of genomes with prevalence as represented in **Table 1**. Further  
133 frequencies of all the mutations were calculated by subtracting variants of Gujarat genomes from  
134 Indian and Global genomes with statistical significance.

135

| NT position | AA position | Genome count    |               |                  | Frequency (%) |       |        | SIFT Score | Functional effect | p-value     |
|-------------|-------------|-----------------|---------------|------------------|---------------|-------|--------|------------|-------------------|-------------|
|             |             | Gujarat (n=361) | INDIA (n=974) | Global (n=57043) | Gujarat       | INDIA | Global |            |                   |             |
| C3037T      |             | 336             | 512           | 42645            | 93.07         | 52.57 | 74.76  | 0.66       | Benign/Tolerated  | 5.78682E-69 |
| A23403G     | Asp614Gly   | 334             | 520           | 42875            | 92.52         | 53.39 | 75.16  | 0.30       | Benign/Tolerated  | 3.36085E-66 |
| C241T       |             | 333             | 509           | 41904            | 92.24         | 52.26 | 73.46  | -          | -                 | 5.89385E-63 |
| C14408T     | Pro4715Leu  | 316             | 500           | 42749            | 87.53         | 51.33 | 74.94  | 0.31       | Benign/Tolerated  | 7.19968E-69 |
| G25563T     | Gln57His    | 194             | 75            | 12387            | 53.74         | 7.70  | 21.72  | 0.00       | Deleterious       | 1.56659E-72 |
| C18877T     |             | 192             | 66            | 1278             | 53.19         | 6.78  | 2.24   | 1.00       | Benign/Tolerated  | 0           |
| C26735T     |             | 185             | 67            | 361              | 51.25         | 6.88  | 0.63   | 1.00       | Benign/Tolerated  | 0           |
| C22444T     |             | 144             | 21            | 62               | 39.89         | 2.16  | 0.11   | 1.00       | Benign/Tolerated  | 0           |
| C28854T     | Ser194Leu   | 137             | 24            | 937              | 37.95         | 2.46  | 1.64   | 0.05       | Deleterious       | 0           |
| C2836T      |             | 129             | 12            | 3                | 35.73         | 1.23  | 0.01   | 0.17       | Benign/Tolerated  | 0           |
| G21724T     | Leu54Phe    | 61              | 1             | 198              | 16.90         | 0.10  | 0.35   | 0.69       | Benign/Tolerated  | 0           |
| C29750T     |             | 52              | 0             | 24               | 14.40         | 0.00  | 0.04   | #N/A       | #N/A              | 0           |
| A2292C      | Gln676Pro   | 51              | 0             | 0                | 14.13         | 0.00  | 0.00   | 0.05       | Deleterious       | 0           |
| C18568T     | Leu6102Phe  | 49              | 0             | 38               | 13.57         | 0.00  | 0.07   | 0.01       | Deleterious       | 0           |
| G4300T      |             | 47              | 0             | 22               | 13.02         | 0.00  | 0.04   | 0.84       | Benign/Tolerated  | 0           |
| C15324T     |             | 40              | 33            | 1297             | 11.08         | 3.39  | 2.27   | 1.00       | Benign/Tolerated  | 4.16974E-28 |
| A16512G     |             | 39              | 0             | 8                | 10.80         | 0.00  | 0.01   | 1.00       | Benign/Tolerated  | 0           |
| C3634T      |             | 37              | 36            | 23               | 10.25         | 3.70  | 0.04   | 0.40       | Benign/Tolerated  | 0           |
| G11083T     | Leu3606Phe  | 16              | 279           | 6059             | 4.43          | 28.64 | 10.62  | 0.01       | Deleterious       | 9.42938E-74 |
| C28311T     | Pro13Leu    | 13              | 255           | 689              | 3.60          | 26.18 | 1.21   | 0.00       | Deleterious       | 0           |
| C6312A      | Thr2016Lys  | 12              | 259           | 531              | 3.32          | 26.59 | 0.93   | 0.03       | Deleterious       | 0           |
| C23929T     |             | 12              | 238           | 493              | 3.32          | 24.44 | 0.86   | 1.00       | Benign/Tolerated  | 0           |
| C13730T     | Ala4489Val  | 11              | 277           | 660              | 3.05          | 28.44 | 1.16   | 0.00       | Deleterious       | 0           |
| C5700A      | Ala1812Asp  | 7               | 140           | 0                | 1.94          | 14.37 | 0.00   | 0.38       | Benign/Tolerated  | 0           |
| C313T       |             | 4               | 146           | 880              | 1.11          | 14.99 | 1.54   | 0.84       | Benign/Tolerated  | 7.1703E-218 |
| C1059T      | Thr265Ile   | 2               | 7             | 9719             | 0.55          | 0.72  | 17.04  | 0.03       | Deleterious       | 2.39204E-55 |

137 **Table 1:** The overall comparison of missense and synonymous mutation frequency profile of  
138 Gujarat-361, India-974 and Global-57,043 dataset.

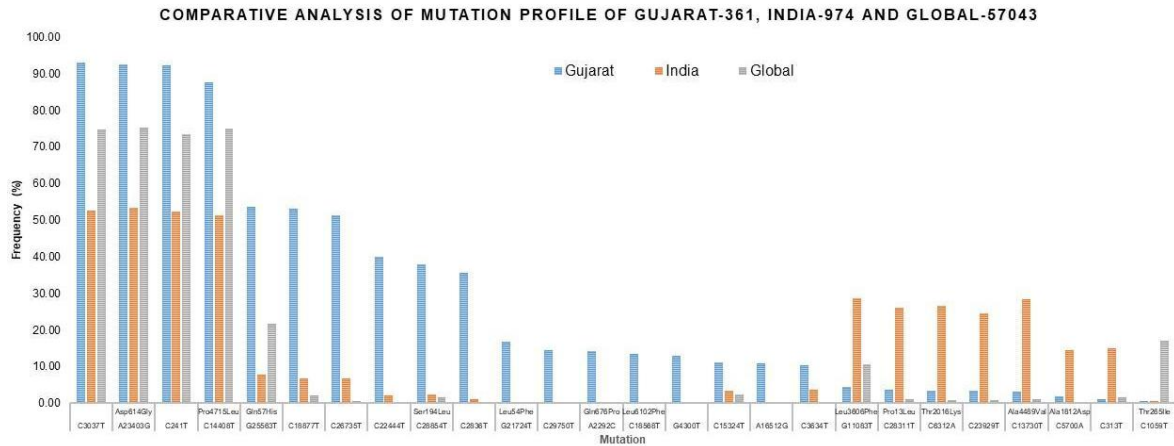

139

140 **Figure 4:** Synonymous and missense mutation profile of the Gujarat-361, India-974, and Global-  
141 57043 dataset with >5% frequency.

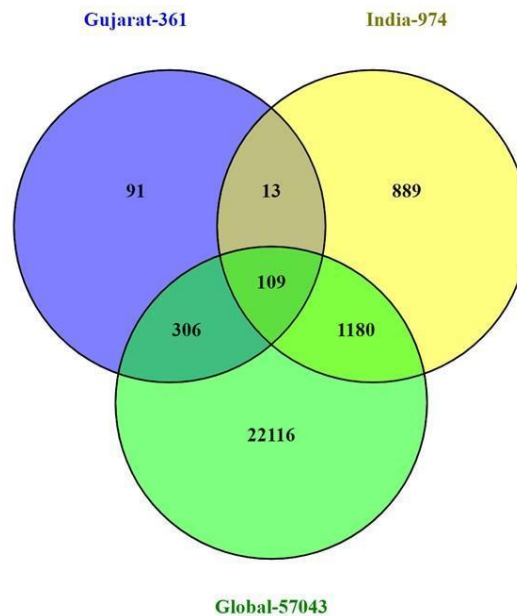

142

143 **Figure 5:** Venn diagram representing the mutually common and exclusive synonymous and  
144 missense mutations among the Gujarat-361, India-974, and Global-57,043 dataset.

145 Mutations C241T, C3037T, A23403G and C14408T mutations were at higher frequencies (>50%)  
146 in all the genomes while G11083T, C13730T, C28311T, C6312A and C23929T mutations were  
147 predominated (>24% frequency) in Indian genomes however at very low frequency (<15%) in  
148 comparison with Global and Gujarat genomes. The mutations G25563T, C26735T, C18877T at  
149 frequency >51% while C2836T, C22444T and C28854T at >35% frequency and G21724T,  
150 C29750T, C18568T and A2292C were occurring at >13% frequency from genomes sequences of



151 Gujarat. All these mutations were found to be statistically significant at  $p$ -value  $<0.001$ . Out of  
152 these mutations A23403G, C14408T, G25563T and C28854T were missense mutations. The  
153 detailed mutation frequency profile is provided as **Supplemental Table S4**. With reference to  
154 Indian genomes, G11083T, C28311T, C6312A, C23929T and C13730T were found to be  
155 occurring at more than 24% frequencies ( $p$ -value  $<0.001$ ). From these mutations, G11083T,  
156 C28311T and C6312A were found to be missense mutations. G11083T and C6312A lie in the  
157 region of Orf1a encoding Nsp6. Further deceased versus recovered patient mutation profile  
158 analysis of the known patient's status dataset from Gujarat and Global is represented in **Figure 6**.  
159 Similarly, comparison of missense mutation profile of deceased versus recovered patients with  
160 genome count, frequency  $>5\%$ , and  $p$ -value for global dataset is represented in **Table 2** and for  
161 Gujarat dataset **Table 3**.

| NT mutation | AA mutation | Global mutation count (genomes) |                   | Global frequency (%) |           | SIFT Score | Functional effect | p-value     |
|-------------|-------------|---------------------------------|-------------------|----------------------|-----------|------------|-------------------|-------------|
|             |             | Deceased (n=131)                | Recovered (n=622) | Deceased             | Recovered |            |                   |             |
| A23403G     | Asp614Gly   | 117                             | 378               | 89.31                | 60.77     | 0.3        | Benign/Tolerated  | 3.95251E-10 |
| C14408T     | Pro4715Leu  | 115                             | 374               | 87.79                | 60.13     | 0.31       | Benign/Tolerated  | 1.64386E-09 |
| G25563T     | Gln57His    | 32                              | 131               | 24.43                | 21.06     | 0          | Deleterious       | 0.395157807 |
| C1059T      | Thr265Ile   | 18                              | 95                | 13.74                | 15.27     | 0.03       | Deleterious       | 0.655252139 |
| G25088T     | Val1176Phe  | 27                              | 0                 | 20.61                | 0.00      | #N/A       | #N/A              | 9.19649E-31 |
| C12053T     | Leu3930Phe  | 11                              | 0                 | 8.40                 | 0.00      | 0.00       | Deleterious       | 3.3299E-13  |
| G11083T     | Leu3606Phe  | 6                               | 48                | 4.58                 | 7.72      | 0.01       | Deleterious       | 0.205974179 |
| T28144C     | Leu84Ser    | 3                               | 92                | 2.29                 | 14.79     | 0.37       | Benign/Tolerated  | 8.98524E-05 |
| G26144T     | Gly251Val   | 1                               | 39                | 0.76                 | 6.27      | 0          | Deleterious       | 0.010644459 |
| C28833T     | Ser187Leu   | 0                               | 31                | 0.00                 | 4.98      | 0.00       | Deleterious       | 0.009068597 |

162 **Table 2:** Comparison of missense mutation frequency in deceased vs recovered patients from global  
163 dataset.

| NT mutation | AA mutation | Gujarat mutation count (genomes) |                   | Frequency (%) |           | SIFT Score | Functional effect | p-value     |
|-------------|-------------|----------------------------------|-------------------|---------------|-----------|------------|-------------------|-------------|
|             |             | Deceased (n=43)                  | Recovered (n=172) | Deceased      | Recovered |            |                   |             |
| A23403G     | Asp614Gly   | 42                               | 160               | 97.67         | 93.02     | 0.30       | Benign/Tolerated  | 0.252398792 |
| C14408T     | Pro4715Leu  | 41                               | 154               | 95.35         | 89.53     | 0.31       | Benign/Tolerated  | 0.240407116 |
| G25563T     | Gln57His    | 23                               | 94                | 53.49         | 54.65     | 0.00       | Deleterious       | 0.891082474 |
| C28854T     | Ser194Leu   | 19                               | 59                | 44.19         | 34.30     | 0.00       | Deleterious       | 0.227942491 |
| G16078A     | Val5272Ile  | 4                                | 9                 | 9.30          | 5.23      | 0.00       | Deleterious       | 0.316597442 |
| C23277T     | Thr572Ile   | 4                                | 5                 | 9.30          | 2.91      | 0.57       | Benign/Tolerated  | 0.061074771 |
| G21724T     | Leu54Phe    | 1                                | 28                | 2.33          | 16.28     | 0.69       | Benign/Tolerated  | 0.016585523 |
| A2292C      | Gln676Pro   | 1                                | 24                | 2.33          | 13.95     | 0.05       | Deleterious       | 0.0333774   |
| C18568T     | Leu6102Phe  | 1                                | 24                | 2.33          | 13.95     | 0.01       | Deleterious       | 0.0333774   |
| G28878A     | Ser202Asn   | 0                                | 12                | 0.00          | 6.98      | 0.00       | Deleterious       | 0.074666193 |

164 **Table 3:** Comparison of missense mutation frequency in deceased vs recovered patients from Gujarat  
165 dataset.

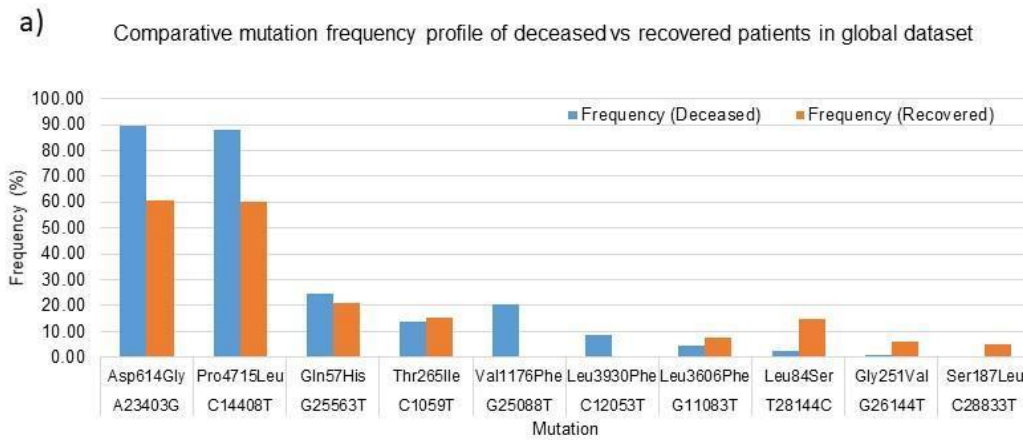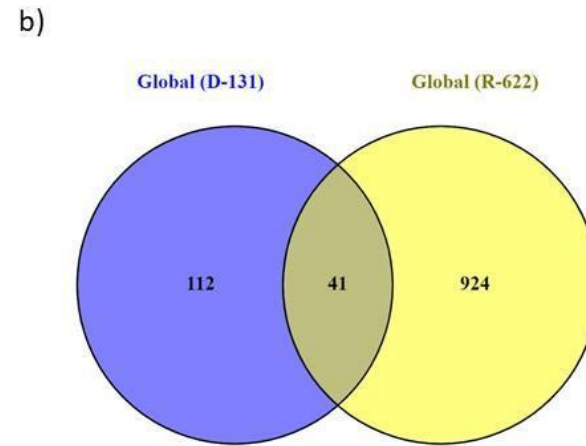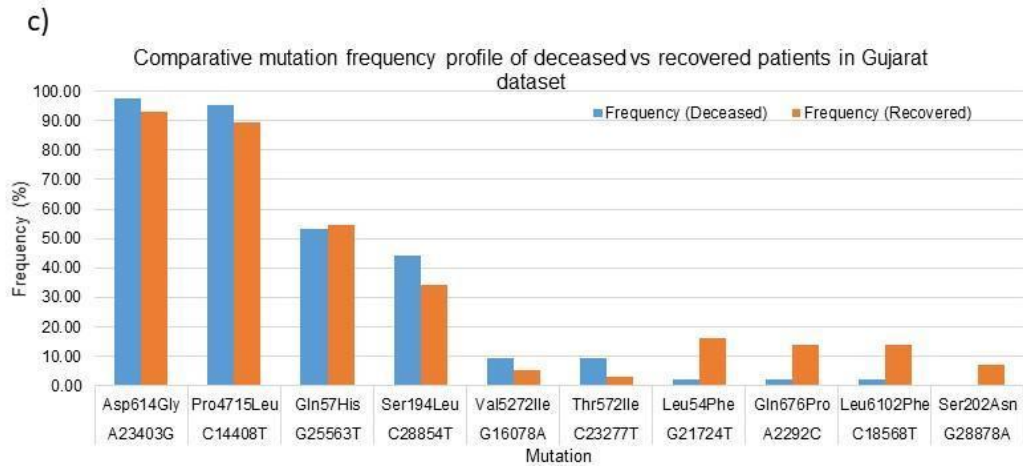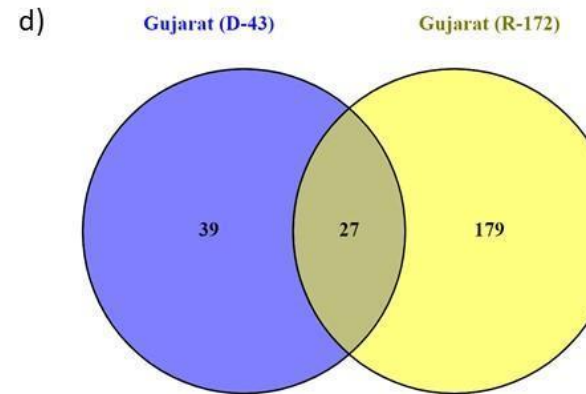

166

167 **Figure 6:** Global and Gujarat mutation frequency analysis of missense mutations **a)** Bar chart for global  
 168 deceased versus recovered patients **b)** Venn diagram of the global deceased versus recovered patients **c)** Bar  
 169 chart for global deceased versus recovered patients **d)** Venn diagram of the Gujarat deceased versus recovered  
 170 patients. Additional Supplemental Table S5 and S6 provided for details of the missense mutations in Gujarat  
 171 and Global dataset of deceased versus recovered patients.

172 The statistical significance association of the gender and age of the deceased and recovered patients  
 173 from Gujarat and global dataset revealed the significant *p-value* for female patients in both datasets  
 174 considered for analysis. Similarly, for age group 41-60 yrs. highlighted the higher observation of  
 175 death rate in patients with known status as given in **Table 4**.

|                     |               | Gujarat (n=361) |            | Global (n=57043) |            |                    |
|---------------------|---------------|-----------------|------------|------------------|------------|--------------------|
|                     |               | Deceased        | Recovered  | Deceased         | Recovered  | <i>p-value</i>     |
| <b>Total Sample</b> |               | <b>43</b>       | <b>172</b> | <b>131</b>       | <b>622</b> | <b>0.380671969</b> |
| <b>Gender</b>       | <b>Male</b>   | <b>24</b>       | <b>113</b> | <b>86</b>        | <b>383</b> | <b>0.826887912</b> |
|                     | <b>Female</b> | <b>19</b>       | <b>59</b>  | <b>45</b>        | <b>278</b> | <b>0.024025225</b> |
| <b>Age (Yrs)</b>    | <b>0-40</b>   | <b>2</b>        | <b>70</b>  | <b>8</b>         | <b>288</b> | <b>0.971968847</b> |
|                     | <b>41-60</b>  | <b>19</b>       | <b>77</b>  | <b>30</b>        | <b>234</b> | <b>0.039186032</b> |
|                     | <b>&gt;60</b> | <b>22</b>       | <b>25</b>  | <b>93</b>        | <b>139</b> | <b>0.393230893</b> |

176 **Table 4:** Chi-square test analysis of the deceased and recovered patients for gender and age group.

## 177 Discussion

178 SARS-CoV-2 viral genome analysis from Gujarat highlights the distinct genomic attributes,  
 179 geographical distribution, age composition and gender classification. These features also highlight  
 180 unique genomic patterns in terms of synonymous and non-synonymous variants associated with  
 181 the prevalence of dominant clades and lineages with distinct geographical locations in Gujarat.  
 182 This work also highlights the most comprehensive genomic resources available so far from India.  
 183 Identifying variants specific to the deceased and recovered patients would certainly aid in better  
 184 treatment and COVID-19 containment strategy. The fatality rate compared with different  
 185 geographical locations may point towards the higher virulence profile of certain viral strains with  
 186 lethal genetic mutations, but this remains clinically unestablished. Perhaps the onset of clinical  
 187 features in the symptomatic patients help in prioritizing the diagnosis and testing strategy.

188 Genomes reported from India are having diverse mutation profiles. The first case report of  
 189 complete genome sequence information from India is from a patient in Kerala with a direct travel  
 190 history to Wuhan, China. Similarly, other isolates from India cluster with Iran, Italy, Spain,  
 191 England, USA and Belgium and probably similar isolates are transmitting in India and may also  
 192 have variable mutation profile (**Mondal et al.; Yadav et al. 2020; Potdar et al. 2020**). The  
 193 dominance of a particular lineage or clade at a particular location merely does not establish the  
 194 biological function of the virus type isolate in terms of higher death rate but the epidemiological  
 195 factors such as clinically diagnosed co-morbidity, age, gender or asymptomatic transmission most

196 likely influencing factor in transmission. Sampling biases could certainly influence the prediction  
197 models but it would definitely narrow down to particular types of isolates and unique mutations  
198 which further experimentally validated to establish their clinical significance. Further, in  
199 subsequent analysis, we have also analysed and identified the mortality rate in different age groups  
200 revealing the age group of 41-60 years were statistically significant with *p-value* of 0.03901.

201 The geographic distribution of the viral isolates is denoted in the phylogeny with the maximum  
202 SARS-CoV-2 positive samples sequenced from Ahmedabad (n=125), followed by Surat (n=65),  
203 Vadodara (n=53), Gandhinagar (n=28), Sabarkantha (n=18) and Rajkot (n=18). The distribution  
204 of dominant lineages in Ahmedabad is steered by occurrences of B.1.36 (n=72), B.1 (n=51) and  
205 B.6 (n=2). The concept of lineages, clades, haplotypes or genotypes is slightly perplexing and  
206 overlapping in terms of definitions with respect to different depositories and analytics. Therefore,  
207 it is most important to define mutations in the isolates that determine their unique position in  
208 phylogeny with respect to geographical distribution, age, gender, and locations of the genotypes  
209 etc. Phylogenetic distribution of the viral genomes across different geographical locations along  
210 with metadata information should help in evaluation of the posterior distribution, virulence,  
211 divergence times and evolutionary rates in viral populations (**Drummond and Rambaut 2007**).  
212 The recurrent mutations occurring independently multiple times in the viral genomes are hallmarks  
213 of convergent evolution in viral genomes with significance in host adaptability, spread and  
214 transmission. Even though, contested in terms of mechanisms driving the pathogenicity and  
215 virulence across different hosts and specifically to human populations across different  
216 geographical locations (**van Dorp et al. 2020; Grifoni et al. 2020**).

217 **Incidence of mutations in deceased and recovered patients:** In the context of the globally  
218 prevalent mutations across different geographical locations, we have analysed viral genome  
219 isolates with most frequent mutations present in the patients from those who have suffered  
220 casualties. The higher death rate, especially in Ahmedabad, India became a cause of serious  
221 concern and remains elusive to be identified with enough scientific evidence. We have identified  
222 differentially dominant and statistically significant mutations prevalent in the viral genome isolates  
223 in Gujarat, India. The dominant mutations in the deceased patients were represented by the change  
224 in A23403G was observed at a frequency of 97.67% in Gujarat (*p-value* of 0.2523) and 89.31%  
225 frequency in global genomes with known patient status (*p-value* of <0.00001). These missense  
226 mutations are found to be observed in the spike protein of the coronavirus genome. The well-  
227 known function of the viral spike protein is in mediating the infection by interacting with the  
228 Angiotensin-converting enzyme 2 (ACE2) receptor (**Guo et al. 2020; Li et al. 2005; Chu et al.**



229 **2020; Guan et al. 2020)** of the human host species. Another mutation, C14408T with a frequency  
230 of 95.35%, present in the Orf1b gene encoding RNA directed RNA polymerase (RDRP) non-  
231 structural protein (nsp12) with a *p-value* of 0.2404 in deceased versus recovered patients from  
232 Gujarat, while also being observed statistically significant in the global dataset with a *p-value* of  
233 <0.00001 with a frequency of 87.79 percent. The comparative analysis of the patients deceased  
234 (n=43) and recovered patients (n=172) in Gujarat as highlighted in **Figure 6** as represented in  
235 Venn diagram. In contrast, the functional role of the RDRP enzyme activity is necessary for the  
236 viral genome replication and transcription of most RNA viruses (**Imbert et al. 2006; Velazquez-**  
237 **Salinas et al., 2020**).

238 The exclusive dominant mutations present in the population of Gujarat, India, and those  
239 simultaneously being statistically significant were at G25563T and at C28854T were present in  
240 the Orf3a and N gene, respectively. The Orf3a gene encodes a protein involved in the regulation  
241 of inflammation, antiviral responses, and apoptosis. Mutation in these regions alters the functional  
242 profile of the nuclear factor- $\kappa$ B (NF- $\kappa$ B) activation and (nucleotide-binding domain leucine-rich  
243 repeat-containing) NLRP3 inflammasome. One of the main features of Orf3a protein is having the  
244 presence of a cysteine-rich domain, which participates in the enzymatic nucleophilic substitution  
245 reactions. This protein is expressed abundantly in infected and transfected cells, which localizes  
246 to intracellular and plasma membranes and also induces apoptosis in transfected and infected cells  
247 (**Issa et al. 2020**). This enzyme mediates extensive proteolytic processing of two overlapping  
248 replicase polyproteins, pp1a and pp1ab, to yield the corresponding functional polypeptides that are  
249 essential for coronavirus replication and transcription processes (**Kohlmeier and Woodland**  
250 **2009; Benvenuto et al. 2020**). Whereas, in case of mutation at position C28311T leading to change  
251 of amino acid proline to leucine lies in the nucleocapsid (N) gene which has a role in virion  
252 assembly and release and plays a significant role in the formation of replication-transcription  
253 complexes (**Yin 2020; J Alsaadi and Jones 2019; Liu 2019; Wu et al. 2020**). Similarly, the  
254 nucleocapsid (N) protein is a highly basic protein that could modulate viral RNA synthesis (**Millet**  
255 **and Whittaker 2015; Hassan et al. 2020; Sarif Hassan et al. 2020**). The Sorting Intolerant from  
256 Tolerant (SIFT) scores of these mutations were determined and also signifies the functional effect  
257 change in whether an amino acid substitution affects protein function or not in terms of the  
258 deleterious effect or benign tolerated. The SIFT score ranges between 0.0 to 0.05 (deleterious) and  
259 0.05 to 1.0 (tolerated) to differentiate the mutation effect (**Vaser et al. 2016**). The predicted SIFT  
260 score of the mutation G25563T in the Orf3a and C28854T in the N gene was classified to be  
261 deleterious in nature. Similarly, a comparison analysis of the global (n=57,043), India (n=974) and

262 Gujarat (n=361), where the “n” is the number of genomes included in the analysis indicates the  
263 overall dominance of C241T, C3037T, A23403G, C14408T, and G25563T. Furthermore,  
264 suggestive of the comparative dominant mutation profile, including nonsynonymous and missense  
265 mutations.

266 Analysis of the dataset of the global deceased (n=131) and recovered patients (n=622) with known  
267 status from the metadata information available on GISAID server with the complete genome  
268 sequences considered in the analysis indicates the dominance of the A23403G, C14408T and  
269 G25563T. The overall comparison of the mutation profile of the patient dataset of deceased and  
270 recovered samples is highlighted in **Figure 8**. While comparing the exclusive missense mutation  
271 profile of the patients recovered and deceased in Gujarat (x=43, y=172) and global dataset (x=131,  
272 y=622), where the “x” is number of deceased patients and “y” is number of recovered patients.

273 While analyzing missense variants from global and Gujarat dataset among deceased and recovered  
274 patients, identified four major mutations to be significantly associated with deceased patients.  
275 However, in the context of global dataset mutation C14408T in the RdRp gene and A23403G in  
276 spike protein gene were found to be associated with deceased patients at *p-value* <0.00001.  
277 Mutations in the N gene at C28854T and mutation in Orf3a at G25563T gene from diseased  
278 patients in Gujarat were found to be significant among deceased patients at *p-value* 0.0094 and  
279 0.231 respectively. Moreover, C28854T is forming a distinct sub-cluster under 20A (A2a as per  
280 old classification of next strain) clade with a frequency of 37.95, 2.46 and 1.64 percent (*p-value*  
281 <0.01) in Gujarat, India and global dataset respectively. The same is highlighted in **Figure 7**. The  
282 same is proposed as a new sub-clade 20D in the next strain and GHJ in GISAID. This sub-clade is  
283 also present in genomes sequenced from Bangladesh and Saudi Arabia. Both these proteins have  
284 a significant role in viral replication and pathogenesis (**Pachetti et al. 2020; Luan et al. 2020;**  
285 **Peter and Schug**).

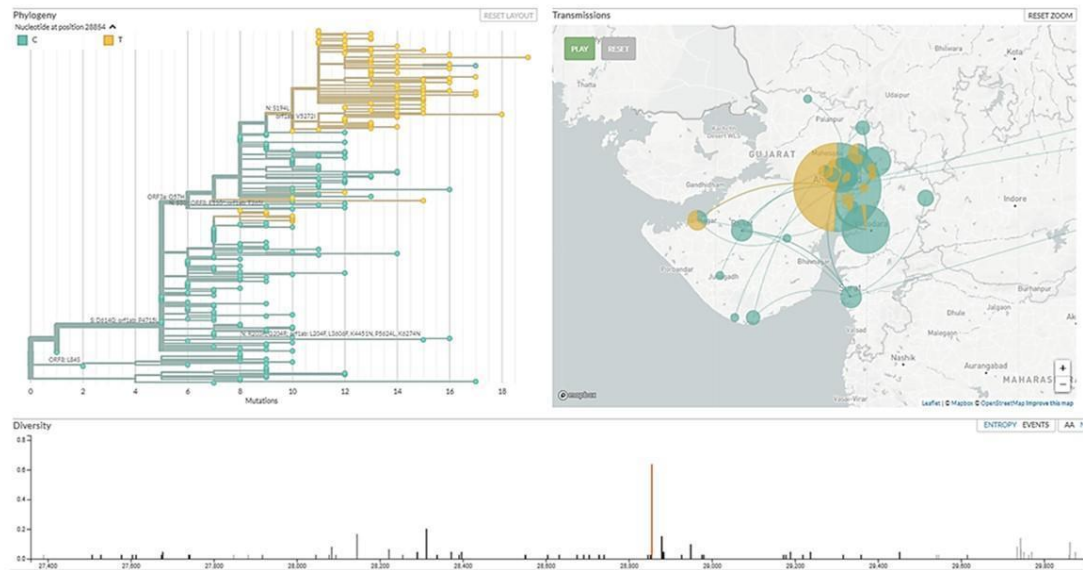

286  
 287 **Figure 7:** Distinct cluster of the C28854T genomes in Gujarat SARS-CoV-2 viral genome isolates.

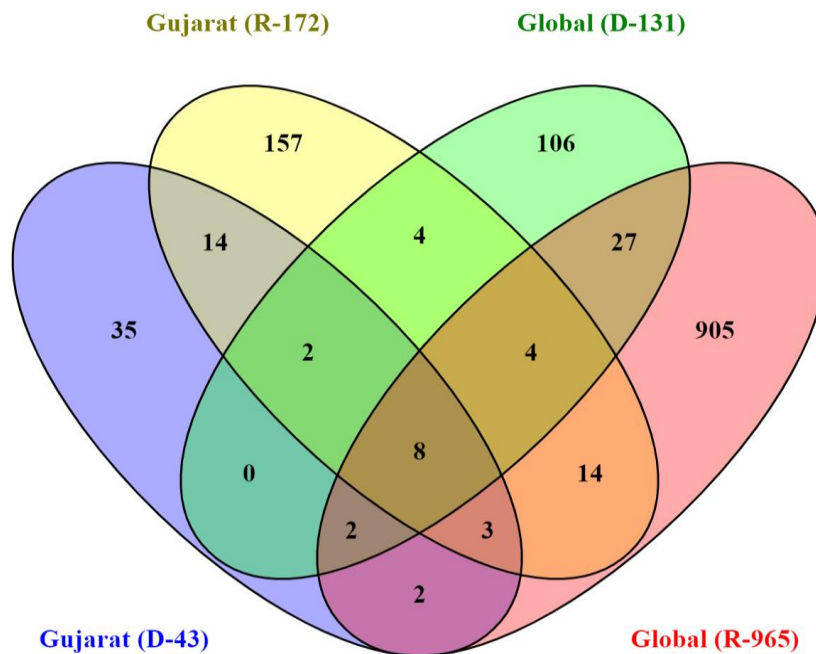

288  
 289 **Figure 8:** Overall comparison of the missense mutations in Gujarat (R=172, D=43), Global  
 290 (R=622, D=131) where “R” is number of genomes from recovered patients, and “D” is the number  
 291 of genomes from deceased patients.  
 292 The association of the mutations with the viral transmission and mortality rate remains a  
 293 mystifying puzzle for the global scientific community. The identification and validation of these  
 294 mutations should pave the way forward for the development of treatment and diagnostics of

295 coronavirus disease. The evading host immune response and defence mechanism sufficiently  
296 improve the adaptive behaviour of pathogenic species, thus, making them highly contagious.  
297 Further, laboratory and experimental studies need to be carried out to validate the exact role of this  
298 particular mutation in respect to the molecular pathways and interactions in the biological systems  
299 despite being a strong possible mutation candidate found in the Gujarat region.

## 300 **Conclusion**

301 The genomics approach has been a useful resource to identify and characterize the virulence,  
302 pathogenicity, and host adaptability of the sequenced viral genomes. Identification and  
303 characterization of the frequently mutated positions in SARS-CoV-2 genome will certainly help  
304 in the further understanding of infection biology of the coronaviruses, development of vaccines  
305 and therapeutics, and drugs repurpose candidates using predictive computational biology  
306 resources. The present study highlights the genomic signature and mutation profile of the 361  
307 SARS-CoV-2 viral genome isolates from 38 different locations representing 18 districts across  
308 Gujarat, India. Further, we have reported significant variants associated with mortality in Gujarat  
309 and Global genomes. As the pandemic is progressing, the virus is also diverging into different  
310 clades. This also provides adaptive advantages to viruses in progression of the disease and its  
311 pandemic potential. In this study, we have reported a distinct cluster of coronavirus under 20A  
312 clade of Nextstrain and proposed it as 20D as per next strain analysis or GHJ as per GISAID  
313 analysis, predominantly present in Gujarat genomes. Understanding the pathogen genome and  
314 tracking its evolution will help in devising better strategies for the development of diagnosis,  
315 treatment, vaccine in response to pandemic.

## 316 **Material and methods**

317 **Sample collection and processing:** Nasopharyngeal and oropharyngeal swabs from a total of 277  
318 individuals tested positive for COVID-19 from 38 locations representing 18 districts of Gujarat  
319 were collected after obtaining informed consent and appropriate ethics approval. The numbers of  
320 samples from these locations were selected on the basis of disease spread in Gujarat. The details  
321 of the samples collected from each location is shown in **Supplemental Table S1**. Samples were  
322 transported as per standard operating procedures as prescribed by the World Health Organisation  
323 (WHO) and Indian Council of Medical Research (ICMR, New Delhi; SoP No: ICMR-NIV/2019-  
324 nCoV/Specimens\_01) to research lab at GBRC and further stored at -20° C till processed.

325 **Whole genome sequencing of SARS-CoV-2:** Total genomic RNA from the samples were isolated  
326 using QIAamp Viral RNA Mini Kit (Cat. No. 52904, Qiagen, Germany) following prescribed

327 biosafety procedure. cDNA from the extracted RNA was made using SuperScript™ III Reverse  
328 Transcriptase first strand kit (Cat. No: 18080093, ThermoFisher Scientific, USA) as per the  
329 procedures prescribed. SARS-CoV-2 genome was amplified by using Ion AmpliSeq SARS-CoV-  
330 2 Research Panel (ThermoFisher Scientific, USA) that consists of two pools with amplicons  
331 ranging from 125 bp to 275 bp in length and covering >99% of the SARS-CoV-2 genome,  
332 including all serotypes. Amplicon libraries were prepared using Ion AmpliSeq™ Library Kit Plus  
333 (Cat. No: A35907; ThermoFisher Scientific, USA). These libraries were quantified using the Ion  
334 Library TaqMan™ Quantitation Kit (Cat. No: 4468802, ThermoFisher Scientific, USA). The  
335 quality of the library was checked on DNA high sensitivity assay kit on Bio-analyser 2100 (Agilent  
336 Technologies, USA) and were sequenced on the Ion S5 Plus sequencing platform using 530 chip.

337 **Raw data quality assessment and filtering:** Quality of data was assessed using FASTQC v.  
338 0.11.5 (Andrews et al., 2014) toolkit. All raw data sequences were processed using PRINSEQ-  
339 lite v.0.20.4 (Schmieder and Edwards 2011) program filtering the data. All sequences were  
340 trimmed from right to where the average quality of 5 bp window was lower than QV25, 5 bp from  
341 the left end were trimmed, sequences with length lower than 50 bp and sequences with average  
342 quality QV25 were removed.

343 **Genome assembly, variant calling and global dataset:** Quality filtered data further assembled  
344 using reference-based mapping with CLC Genomics Workbench 12. Mapping was done using  
345 stringent parameters with length fraction to 0.99 and similarity fraction 0.9. Mapping tracks were  
346 used to call and annotate variants. Variants with minimum allele frequency 30% with minimum  
347 coverage 10 reads were considered. For comparative analysis with the global dataset of 57,043  
348 complete viral genomes and 974 viral genome isolates from India were downloaded from GISAID  
349 flu server (<https://www.gisaid.org/>), as accessed on 4<sup>th</sup> July, 2020.

350 **Phylogenetic analysis:** A total of 361 SARS-CoV-2 whole genomes sequenced in our research  
351 laboratory, as described in the above sections, were analyzed for the phylogenetic distribution. The  
352 reference genome, Wuhan/Hu-1/2019 (EPI\_ISL\_402125) was downloaded from GISAID flu  
353 server, which was sampled on 31<sup>st</sup> Dec 2019 from Wuhan, China. Additionally, three more viral  
354 genomes were included in the phylogenetic analysis Wuhan/WH01/2019 (EPI\_ISL\_406798,  
355 sampled on 26 Dec 2019, Male, 44 yrs.), Wuhan/WIV04/2019 (EPI\_ISL\_402124, sampled on 30  
356 Dec 2019, Female, 49 yrs.), and Wuhan/WH04/2020 (EPI\_ISL\_406801, sampled on 05 Jan 2020,  
357 Male, 39 yrs.). The multiple sequence alignment was performed using MAFFT (Kato and  
358 Standley 2013) implemented via a phylodynamic alignment pipeline provided by Augur



359 (<https://github.com/nextstrain/augur>). The subsequent alignment output files were checked,  
360 visualized and verified using PhyloSuite (**Zhang et al. 2020**). Afterwards, the maximum likelihood  
361 phylogenetic tree was built using the Augur tree implementation pipeline with the IQ-TREE 2  
362 (**Minh et al. 2020**) with default parameters. The selected metadata information is plotted in the  
363 time resolved phylogenetic tree was constructed using TreeTime (**Sagulenko et al. 2018**),  
364 annotated and visualized in the FigTree (**Rambaut et al., 2018**).

365 **Statistical analysis:** The chi-square test of significance was used to check the effect of age, gender  
366 and mutations on mortality.

### 367 **Data access**

368 The raw data generated in this study have been submitted to the NCBI BioProject database  
369 (<https://www.ncbi.nlm.nih.gov/bioproject>) under accession number PRJNA625669.  
370 Supplementary dataset to this manuscript are also available at Mendeley Data with DOI:  
371 10.17632/pc38m6mwxt.1 (<https://data.mendeley.com/datasets/pc38m6mwxt/draft?a=1aa66c2a-5b93-456f-816c-3f26a482dc2a>). All datasets of COVID-19 are also provided on GBRC-COVID  
372 portal (<http://covid.gbrc.org.in/>).

374 **Acknowledgements:** The authors are grateful to the Secretary, Department of Science and  
375 Technology (DST), and Health Commissioner Government of Gujarat, Gandhinagar, Gujarat,  
376 India. Authors are also thankful to the clinical staff for extending support in sample  
377 collection. Authors would like to acknowledge Dr. Manish Kumar, IIT-Gandhinagar for critically  
378 reviewing and providing essential inputs in the manuscript, Dr. Raghawendra Kumar and Mr.  
379 Zuber Saiyed for providing additional support to genome assembly of viral genomes.

380

### 381 **Author contributions**

382 MJ, SB and CJ conceptualized the work plan and guided it for analysis of primary data,  
383 interpretation of data, and editing of the manuscript. AP, DK, AA, and MJ retrieved and analyzed  
384 the data and generated tables and figures under supervision of CJ. MJ, DK and AP wrote the  
385 manuscript. MP, JR, ZP, PT and MG did sample processing and RNA isolation. LP, KP and NS  
386 did genome sequencing. SK did data analysis and manuscript editing.

### 387 **Competing interest statement**

388 The authors declare no competing interests

389 **Funding**

390 Department of Science and Technology (DST), Government of Gujarat, Gandhinagar, India

391 **References**

392 Andrews, S., 2016. FastQC Version 0.11. 5. *A Quality Control Tool for High Throughput*  
393 *Sequence Data*.

394 Benvenuto D, Angeletti S, Giovanetti M, Bianchi M, Pascarella S, Cauda R, Ciccozzi M,  
395 Cassone A. 2020. Evolutionary analysis of SARS-CoV-2: how mutation of Non-Structural  
396 Protein 6 (NSP6) could affect viral autophagy. *J Infect*.

397 Chu DKW, Pan Y, Cheng SMS, Hui KPY, Krishnan P, Liu Y, Ng DYM, Wan CKC, Yang P,  
398 Wang Q, et al. 2020. Molecular Diagnosis of a Novel Coronavirus (2019-nCoV) Causing an  
399 Outbreak of Pneumonia. *Clin Chem* **555**: 549–555.

400 Drummond AJ, Rambaut A. 2007. BEAST: Bayesian evolutionary analysis by sampling trees.  
401 *BMC Evol Biol* **7**.

402 Du L, He Y, Zhou Y, Liu S, Zheng BJ, Jiang S. 2009. The spike protein of SARS-CoV - A target  
403 for vaccine and therapeutic development. *Nat Rev Microbiol* **7**: 226–236.

404 Grifoni A, Sidney J, Zhang Y, Scheuermann RH, Peters B, Sette A. 2020. A Sequence  
405 Homology and Bioinformatic Approach Can Predict Candidate Targets for Immune  
406 Responses to SARS-CoV-2. *Cell Host Microbe* **27**: 671-680.e2.

407 Guan W, Ni Z, Hu Y, Liang W, Ou C, He J, Liu L, Shan H, Lei C, Hui DSC, et al. 2020. Clinical  
408 characteristics of coronavirus disease 2019 in China. *N Engl J Med* **382**: 1708–1720.

409 Guo YR, Cao QD, Hong ZS, Tan YY, Chen SD, Jin HJ, Tan K Sen, Wang DY, Yan Y. 2020.  
410 The origin, transmission and clinical therapies on coronavirus disease 2019 (COVID-19)  
411 outbreak- A n update on the status. *Mil Med Res* **7**.

412 Hadfield J, Megill C, Bell SM, Huddleston J, Potter B, Callender C, Sagulenko P, Bedford T,  
413 Neher RA. 2018. NextStrain: Real-time tracking of pathogen evolution. *Bioinformatics* **34**:  
414 4121–4123.

415 Hassan SS, Choudhury PP, Basu P, Jana SS. 2020. Molecular conservation and differential  
416 mutation on ORF3a gene in Indian SARS-CoV-2 genomes. *Genomics* **112**: 3226–3237.  
417 <https://doi.org/10.1016/j.ygeno.2020.06.016>.

- 418 Imbert I, Guillemot JC, Bourhis JM, Bussetta C, Coutard B, Egloff MP, Ferron F, Gorbalenya  
419 AE, Canard B. 2006. A second, non-canonical RNA-dependent RNA polymerase in SARS  
420 coronavirus. *EMBO J* **25**: 4933–4942.
- 421 Issa E, Merhi G, Panossian B, Salloum T, Tokajian S. 2020. SARS-CoV-2 and ORF3a:  
422 Nonsynonymous Mutations, Functional Domains, and Viral Pathogenesis. *mSystems* **5**.
- 423 J Alsaadi EA, Jones IM. 2019. Membrane binding proteins of coronaviruses. *Future Virol* **14**:  
424 275–286.
- 425 Katoh K, Standley DM. 2013. MAFFT multiple sequence alignment software version 7:  
426 Improvements in performance and usability. *Mol Biol Evol* **30**: 772–780.
- 427 Kohlmeier JE, Woodland DL. 2009. Immunity to Respiratory Viruses. *Annu Rev Immunol* **27**:  
428 61–82.
- 429 Li W, Zhang C, Sui J, Kuhn JH, Moore MJ, Luo S, Wong SK, Huang IC, Xu K, Vasilieva N, et  
430 al. 2005. Receptor and viral determinants of SARS-coronavirus adaptation to human ACE2.  
431 *EMBO J* **24**: 1634–1643.
- 432 Liu DX. 2019. Downloaded from [www.annualreviews.org](http://www.annualreviews.org) Access provided by 103. *Annu Rev*  
433 *Microbiol* **73**: 529–557. <https://doi.org/10.1146/annurev-micro-020518->.
- 434 Luan J, Lu Y, Jin X, Zhang L. 2020. Spike protein recognition of mammalian ACE2 predicts the  
435 host range and an optimized ACE2 for SARS-CoV-2 infection. *Biochem Biophys Res*  
436 *Commun* **526**: 165–169.
- 437 Leung K, Wu JT, Liu D, Leung GM. 2020. First-wave COVID-19 transmissibility and severity  
438 in China outside Hubei after control measures, and second-wave scenario planning: a  
439 modelling impact assessment. *Lancet* **395**: 1382–1393. [http://dx.doi.org/10.1016/S0140-](http://dx.doi.org/10.1016/S0140-6736(20)30746-7)  
440 [6736\(20\)30746-7](http://dx.doi.org/10.1016/S0140-6736(20)30746-7).
- 441 Strzelecki A. 2020. The second worldwide wave of interest in coronavirus since the COVID-19  
442 outbreaks in South Korea, Italy and Iran: A Google Trends study. *Brain Behav Immun* **19**:  
443 2–5.
- 444 Trade UK, Observatory P, Tro IN, On DUCTI. 2020. Covid-19 : a Trade Bargain To Secure  
445 Supplies of Medical Goods.
- 446 Millet JK, Whittaker GR. 2015. Host cell proteases: Critical determinants of coronavirus tropism

- 447 and pathogenesis. *Virus Res* **202**: 120–134.
- 448 Minh BQ, Schmidt HA, Chernomor O, Schrempf D, Woodhams MD, von Haeseler A, Lanfear  
449 R. 2020. IQ-TREE 2: New Models and Efficient Methods for Phylogenetic Inference in the  
450 Genomic Era. *Mol Biol Evol* **37**: 1530–1534.
- 451 Mondal, M., Lawarde, A. and Somasundaram, K., 2020. Genomics of Indian SARS-CoV-2:  
452 Implications in genetic diversity, possible origin and spread of virus. *Current Science*  
453 (00113891), 118(11).
- 454 Pachetti M, Marini B, Benedetti F, Giudici F, Mauro E, Storici P, Masciovecchio C, Angeletti S,  
455 Ciccozzi M, Gallo RC, et al. 2020. Emerging SARS-CoV-2 mutation hot spots include a  
456 novel RNA-dependent-RNA polymerase variant. *J Transl Med* **18**.
- 457 Peter EK, Schug A. The inhibitory effect of a Corona virus spike protein fragment with ACE2.  
458 <https://doi.org/10.1101/2020.06.03.132506>.
- 459 Potdar V, Cherian S, Deshpande G, Ullas P, Yadav P, Choudhary M, Gughe R, Vipat V, Jadhav  
460 S, Patil S, et al. 2020. Genomic analysis of SARS-CoV-2 strains among Indians returning  
461 from Italy, Iran & China, & Italian tourists in India. *Indian J Med Res* **151**: 255–260.
- 462 Rambaut, A. and Drummond, A.J., 2018. FigTree v1. 4.4. Institute of Evolutionary Biology.  
463 University of Edinburgh, Edinburgh.
- 464 Sagulenko P, Puller V, Neher RA. 2018. TreeTime: Maximum-likelihood phylodynamic  
465 analysis. *Virus Evol* **4**.
- 466 Sarif Hassan S, Pal Choudhury P, Roy B, Sankar Jana S. *Missense mutations in SARS-CoV2*  
467 *genomes from Indian patients*.
- 468 Schmieder R, Edwards R. 2011. Quality control and preprocessing of metagenomic datasets.  
469 *Bioinformatics* **27**: 863–864.
- 470 Shereen MA, Khan S, Kazmi A, Bashir N, Siddique R. 2020. COVID-19 infection: Origin,  
471 transmission, and characteristics of human coronaviruses. *J Adv Res* **24**: 91–98.
- 472 van Dorp L, Acman M, Richard D, Shaw LP, Ford CE, Ormond L, Owen CJ, Pang J, Tan CCS,  
473 Boshier FAT, et al. 2020. Emergence of genomic diversity and recurrent mutations in  
474 SARS-CoV-2. *Infect Genet Evol* **83**.
- 475 Vaser R, Adusumalli S, Leng SN, Sikic M, Ng PC. 2016. SIFT missense predictions for

- 476 genomes. *Nat Protoc* **11**: 1–9.
- 477 Velazquez-Salinas L, Zarate S, Eberl S, Novella I, Borca M V. Positive selection of ORF3a and  
478 ORF8 genes drives the evolution of SARS-CoV-2 during the 2020 COVID-19 pandemic.  
479 <https://doi.org/10.1101/2020.04.10.035964>.
- 480 Wu A, Peng Y, Huang B, Ding X, Wang X, Niu P, Meng J, Zhu Z, Zhang Z, Wang J, et al. 2020.  
481 Genome Composition and Divergence of the Novel Coronavirus (2019-nCoV) Originating  
482 in China. *Cell Host Microbe* **27**: 325–328.
- 483 Xu S, Li Y. 2020. Beware of the second wave of COVID-19. *Lancet* **395**: 1321–1322.
- 484 Yadav P, Potdar V, Choudhary M, Nyayanit D, Agrawal M, Jadhav S, Majumdar T, Shete-Aich  
485 A, Basu A, Abraham P, et al. 2020. Full-genome sequences of the first two SARS-CoV-2  
486 viruses from India. *Indian J Med Res* **151**: 200–209.
- 487 Yin C. 2020. Genotyping coronavirus SARS-CoV-2: methods and implications. *Genomics*.
- 488 Zhang, D., Gao, F., Jakovlić, I., Zou, H., Zhang, J., Li, W.X. and Wang, G.T., 2020. PhyloSuite:  
489 an integrated and scalable desktop platform for streamlined molecular sequence data  
490 management and evolutionary phylogenetics studies. *Molecular ecology resources*, **20(1)**,  
491 pp.348-355.



### Mutations across SARS-CoV2 genomes from the Gujarat State

Reference to Wuhan-Hu1

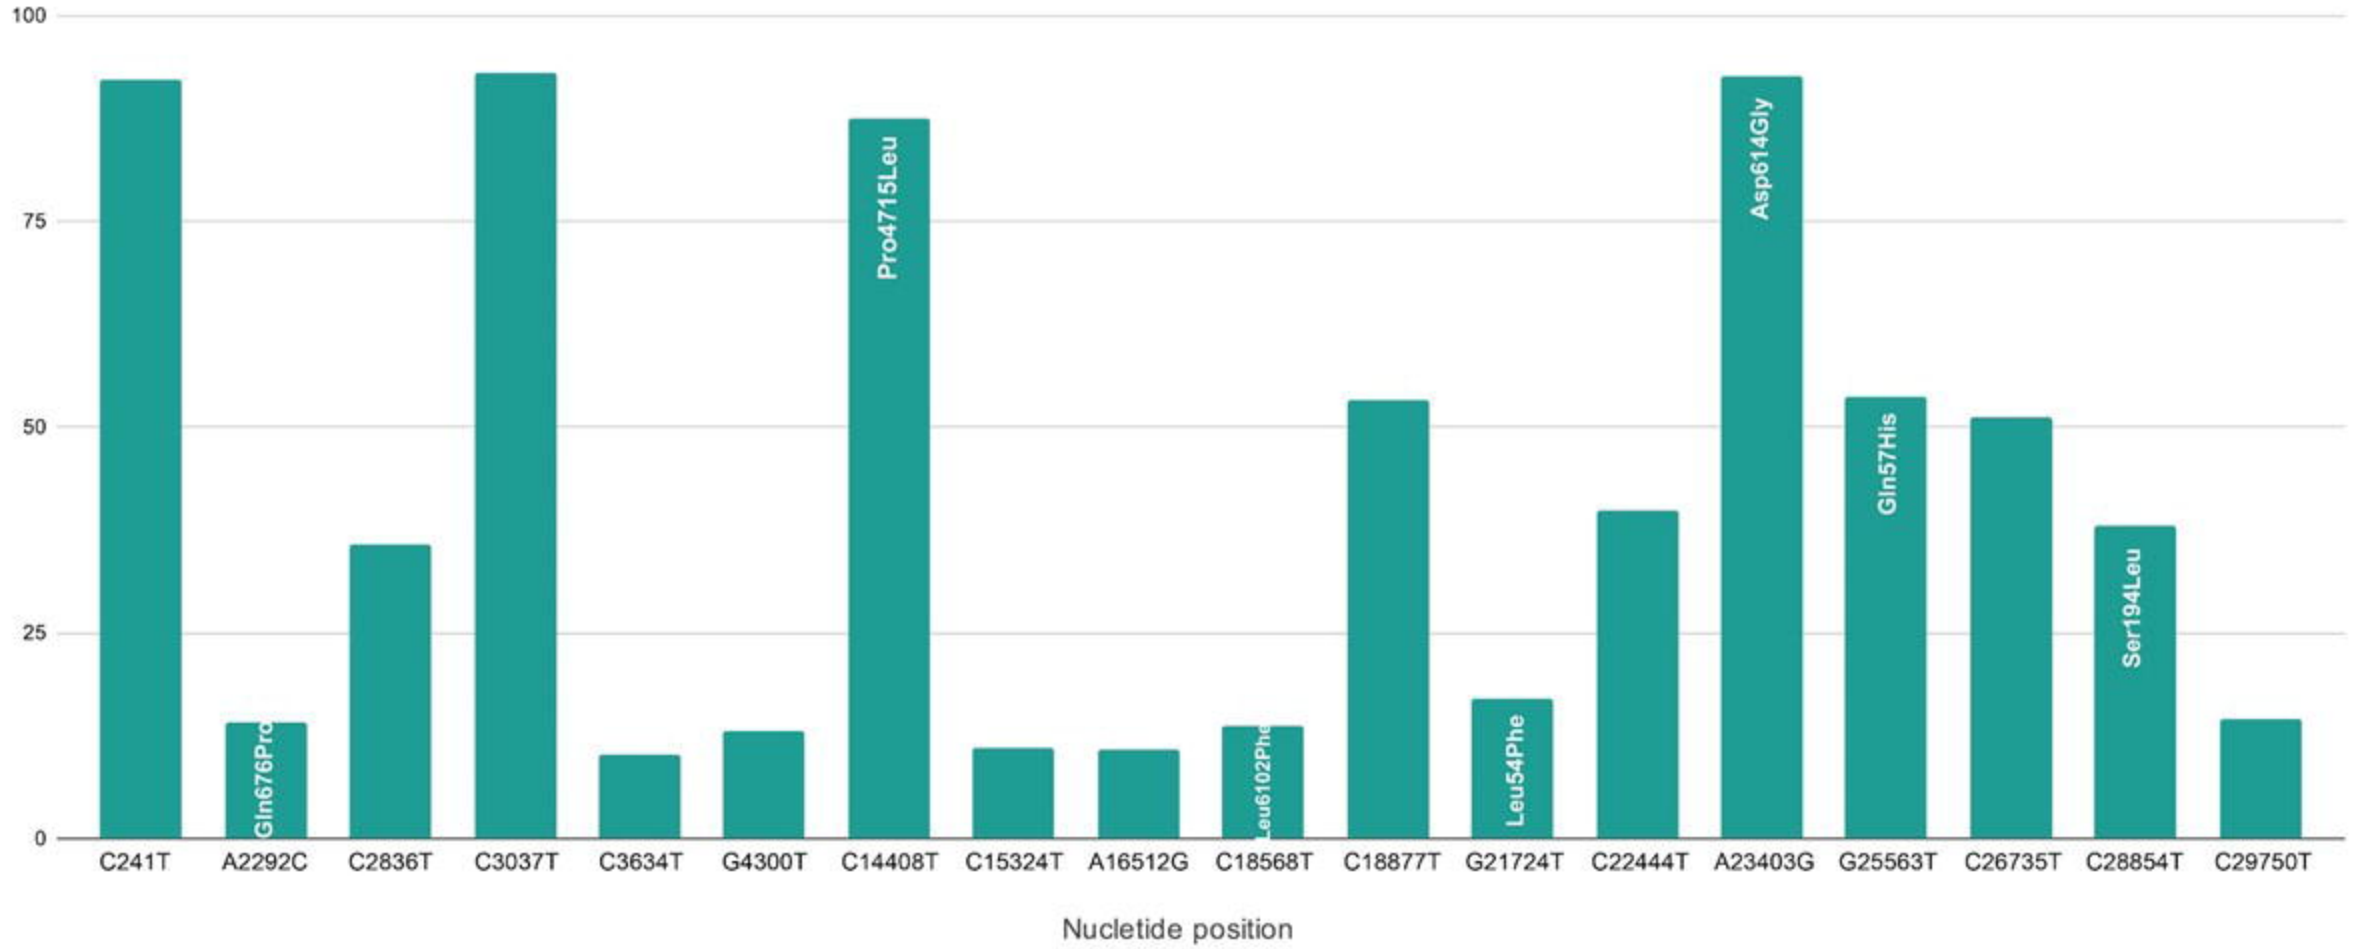



Lineage

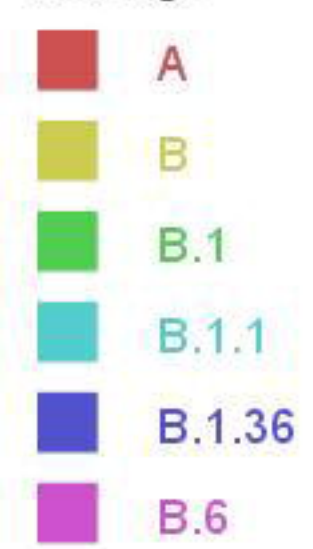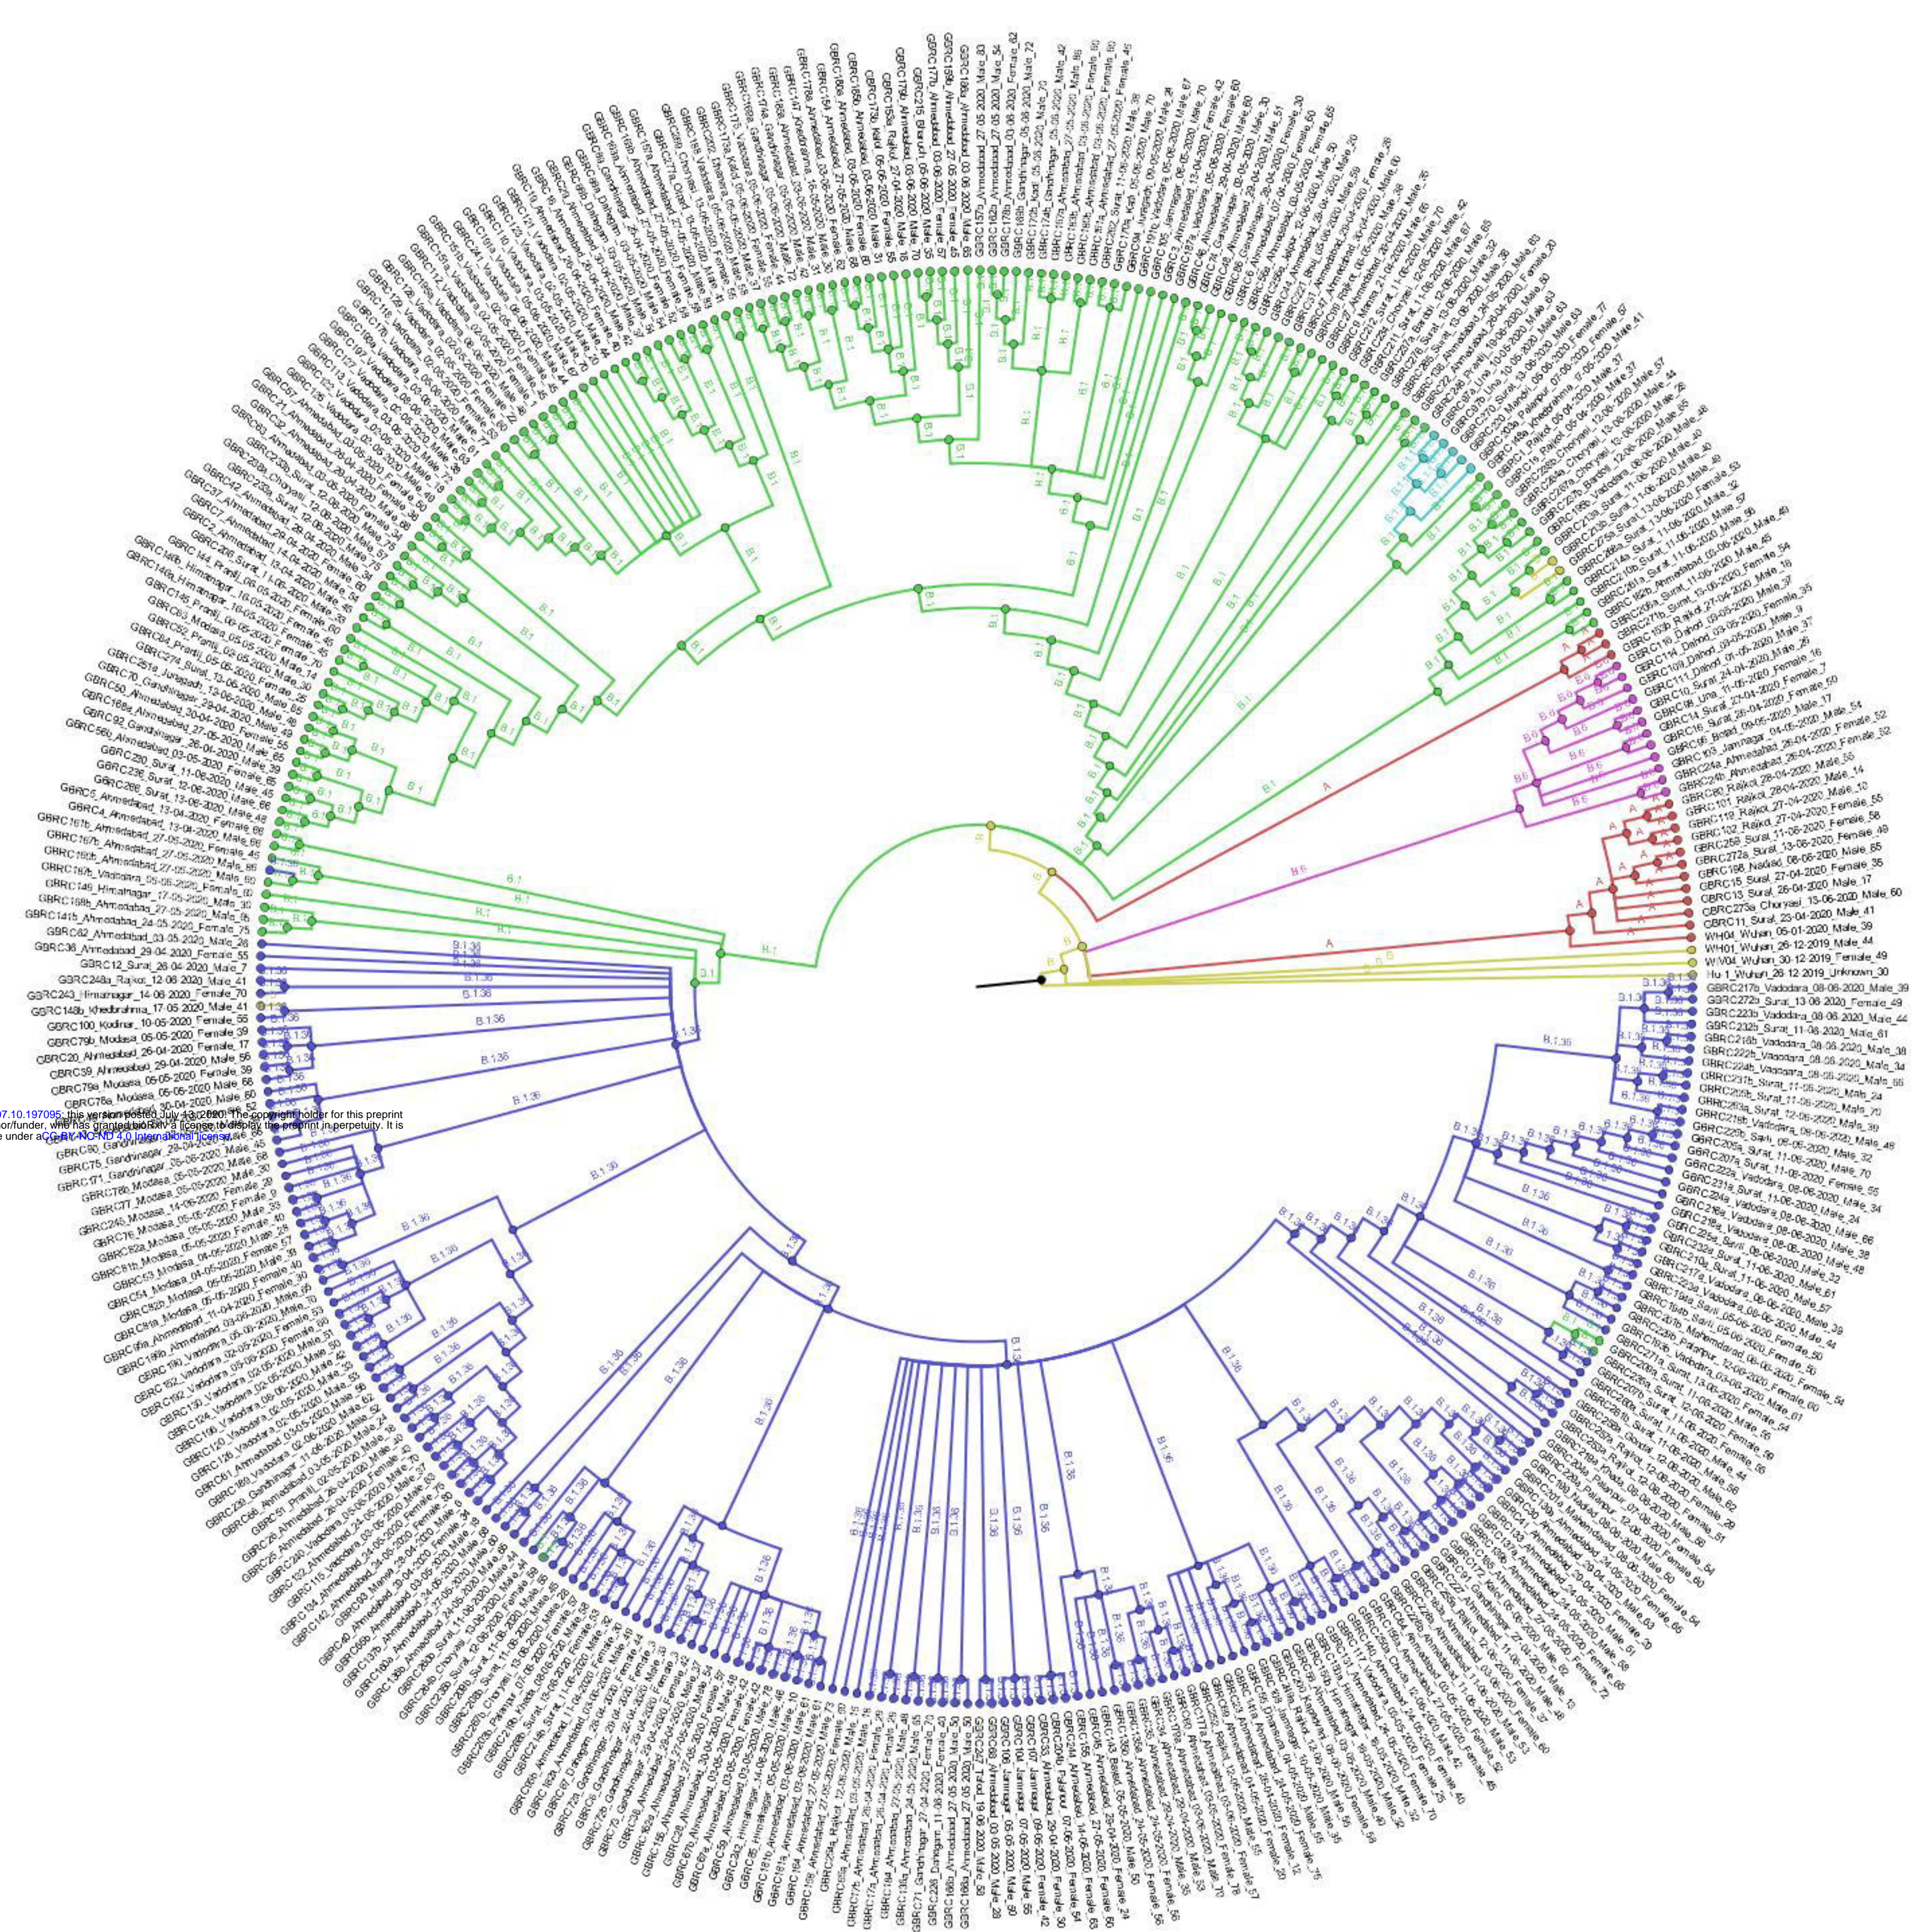

bioRxiv preprint doi: <https://doi.org/10.1101/2020.07.10.197095>; this version posted July 14, 2020. The copyright holder for this preprint (which was not certified by peer review) is the author/funder, who has granted bioRxiv a license to display the preprint in perpetuity. It is made available under aCC-BY-NC-ND 4.0 International license.



Distribution of GISAID Clades over the continents vs Gujarat

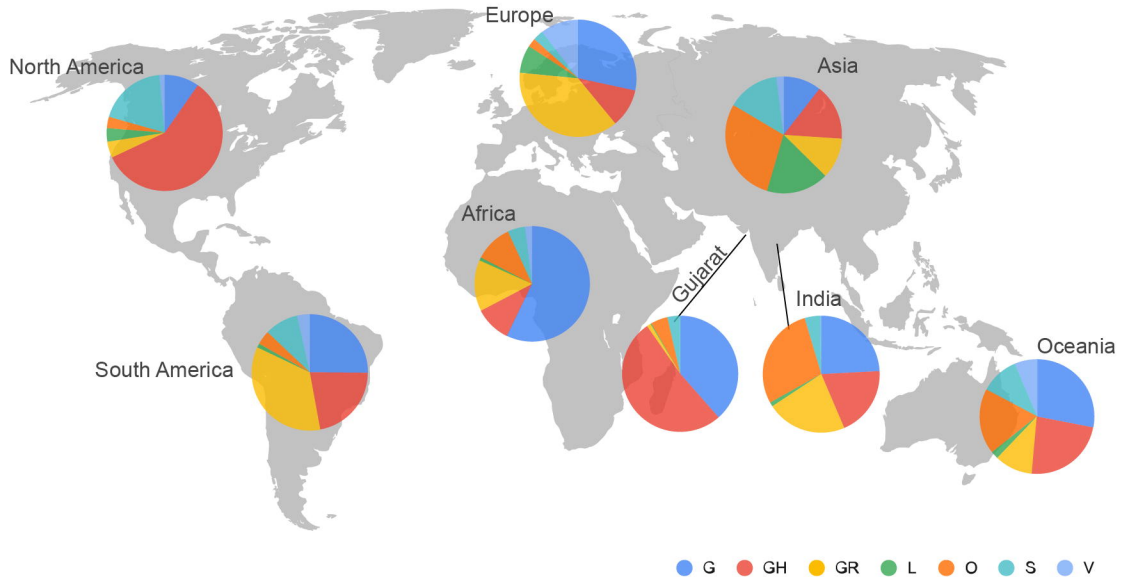

## COMPARATIVE ANALYSIS OF MUTATION PROFILE OF GUJARAT-361, INDIA-974 AND GLOBAL-57043

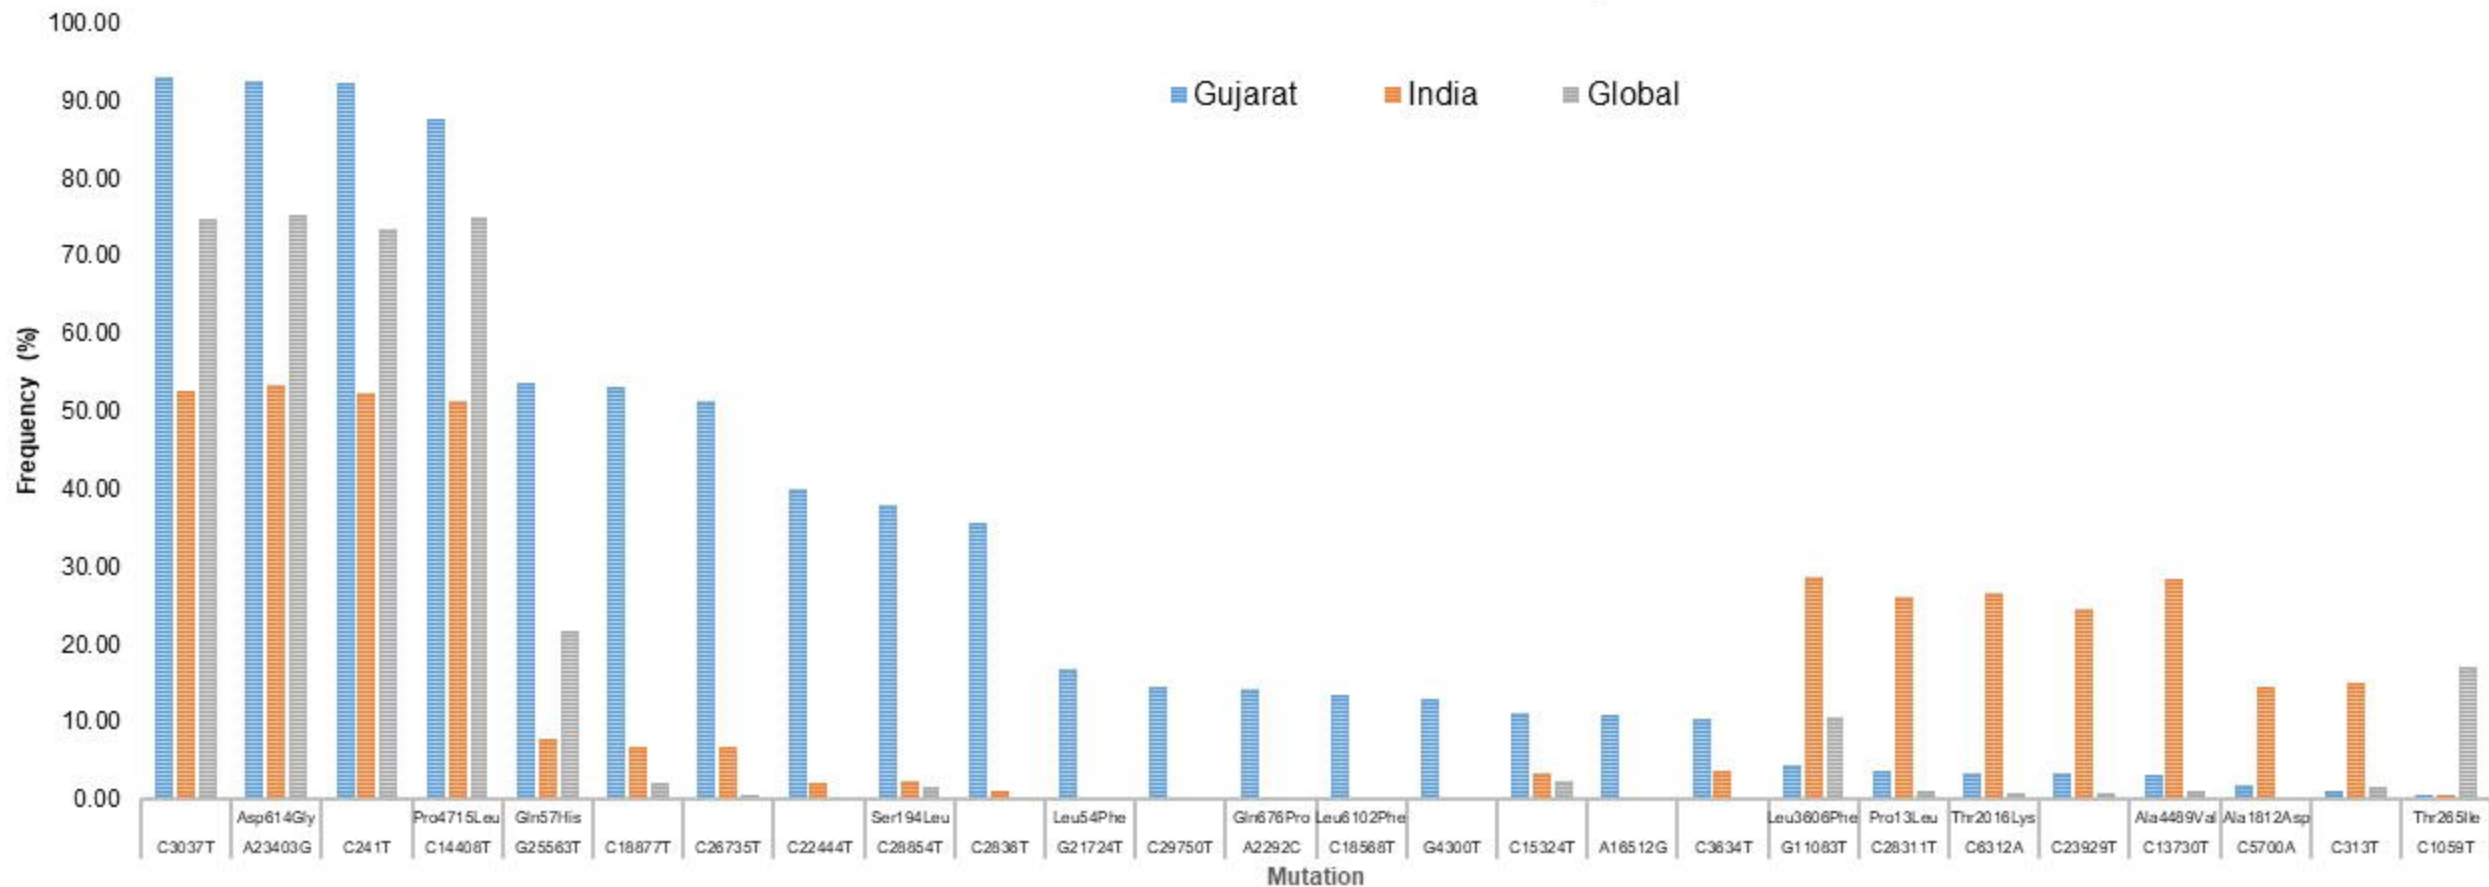

**Gujarat-361**

**India-974**

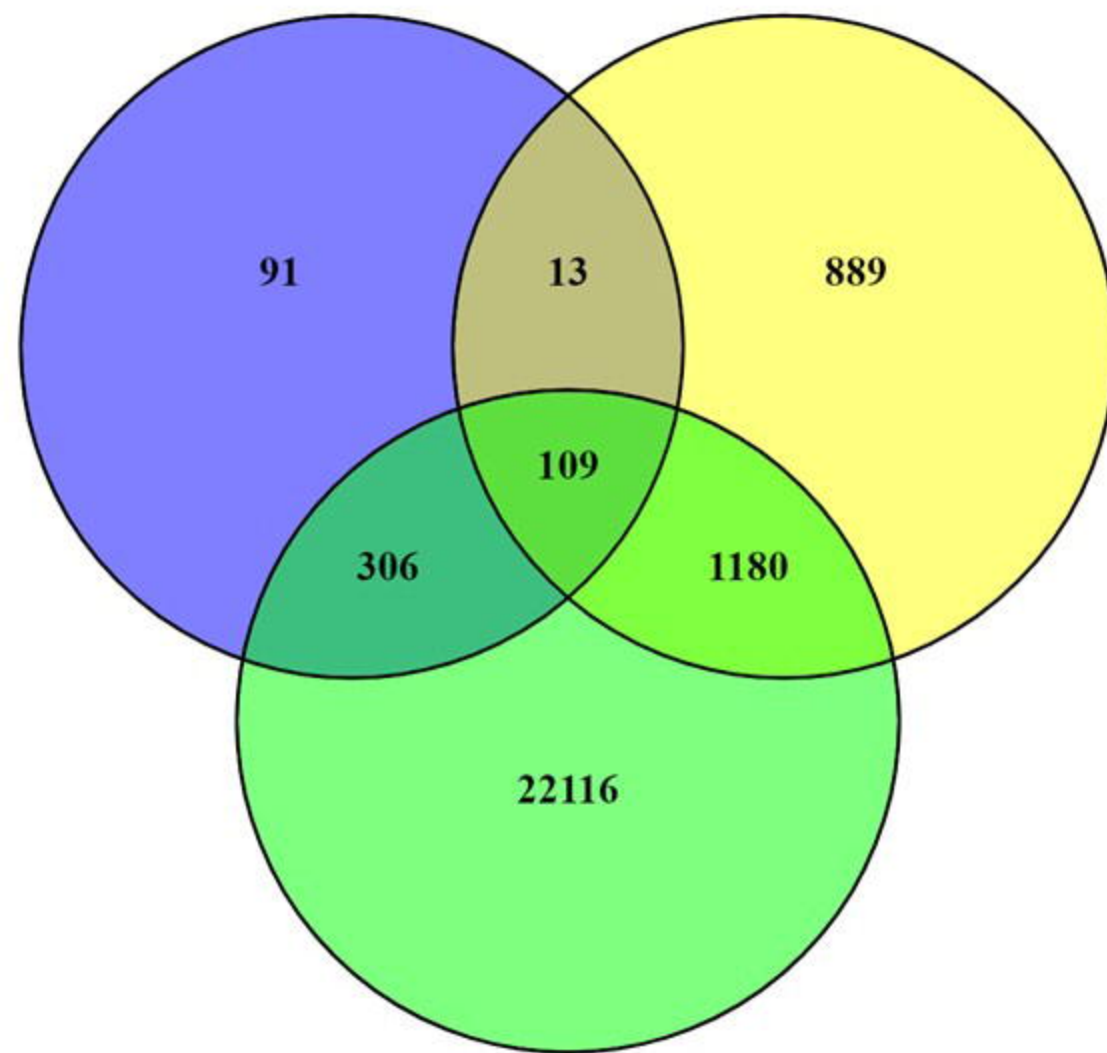

**Global-57043**



a) Comparative mutation frequency profile of deceased vs recovered patients in global dataset

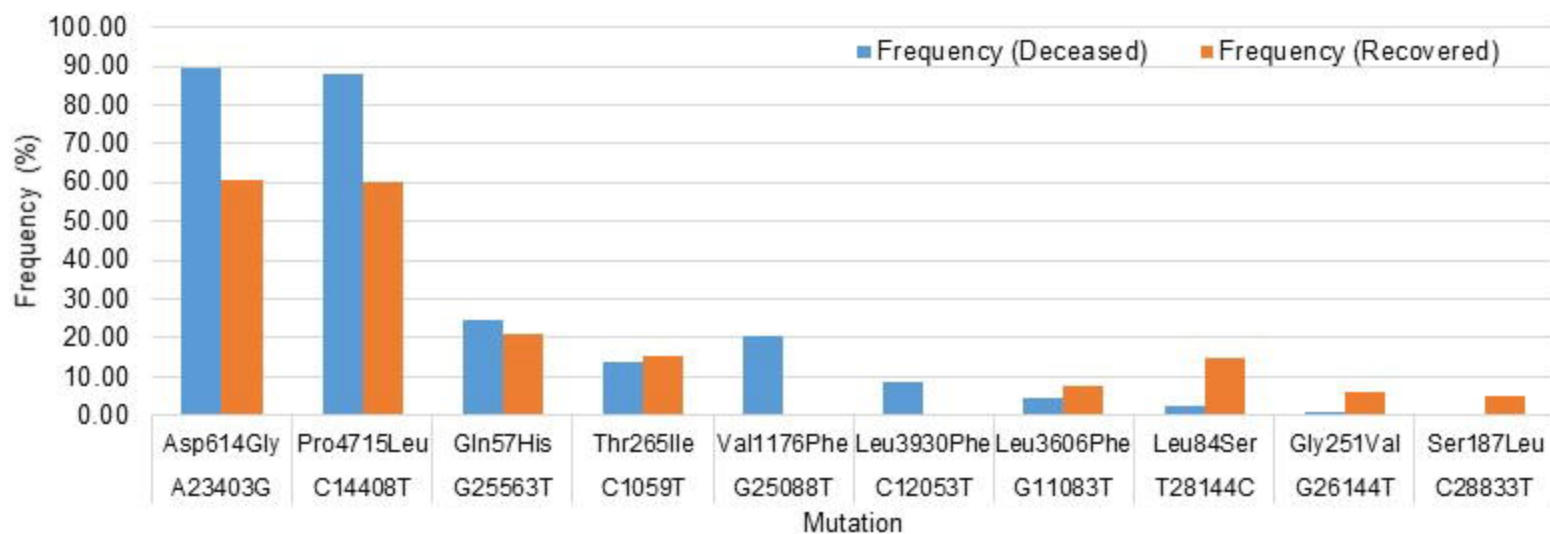

b)

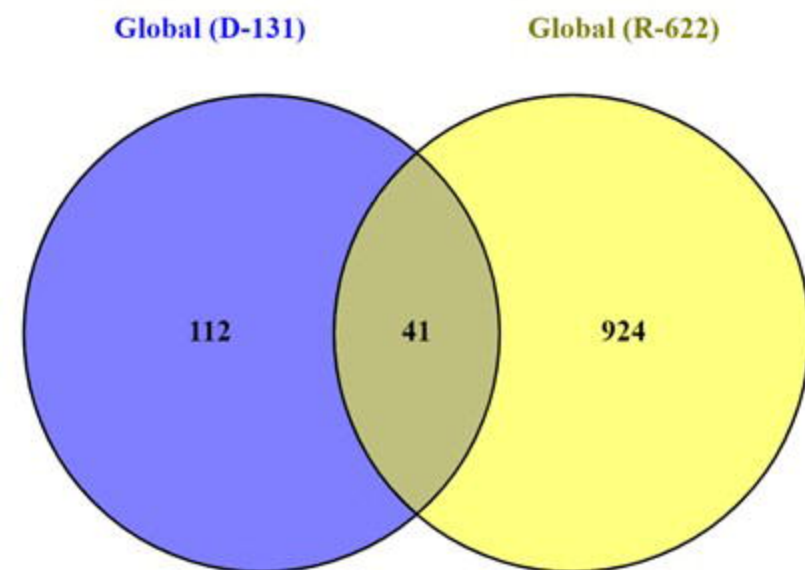

c) Comparative mutation frequency profile of deceased vs recovered patients in Gujarat dataset

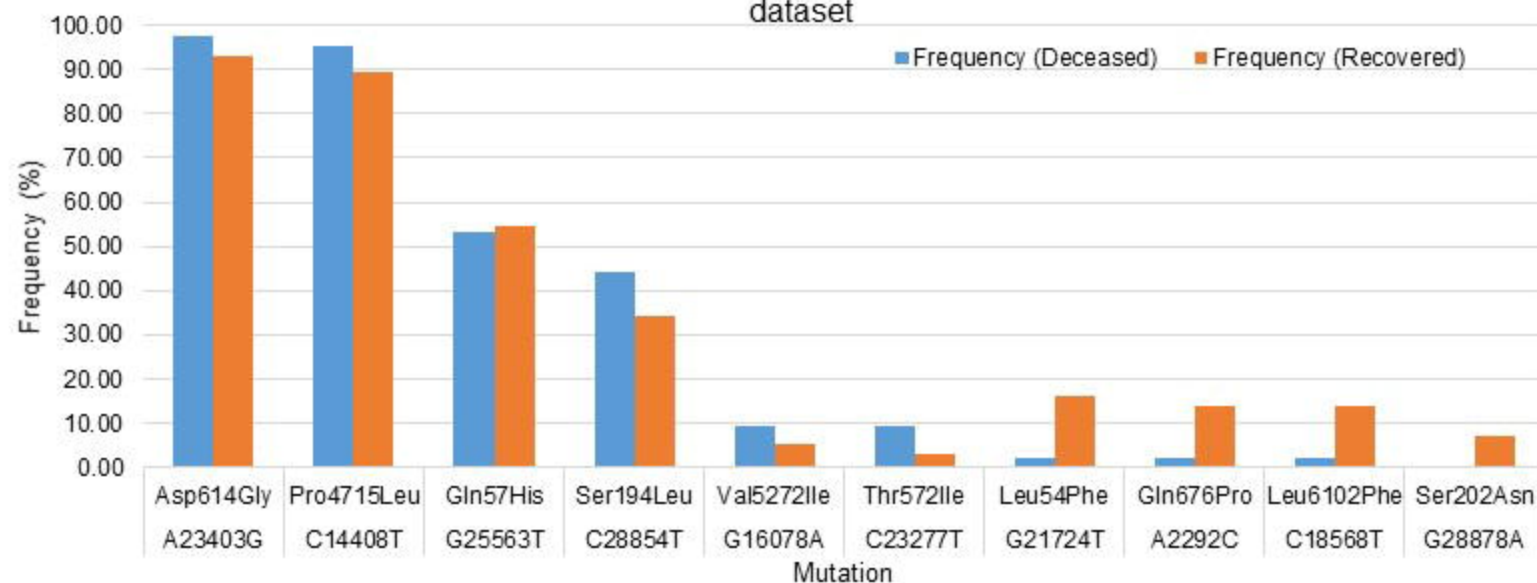

d)

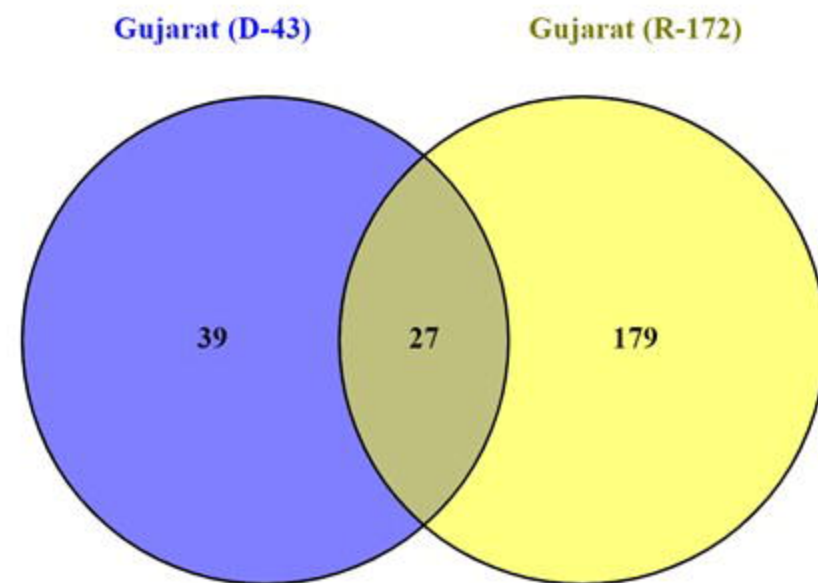



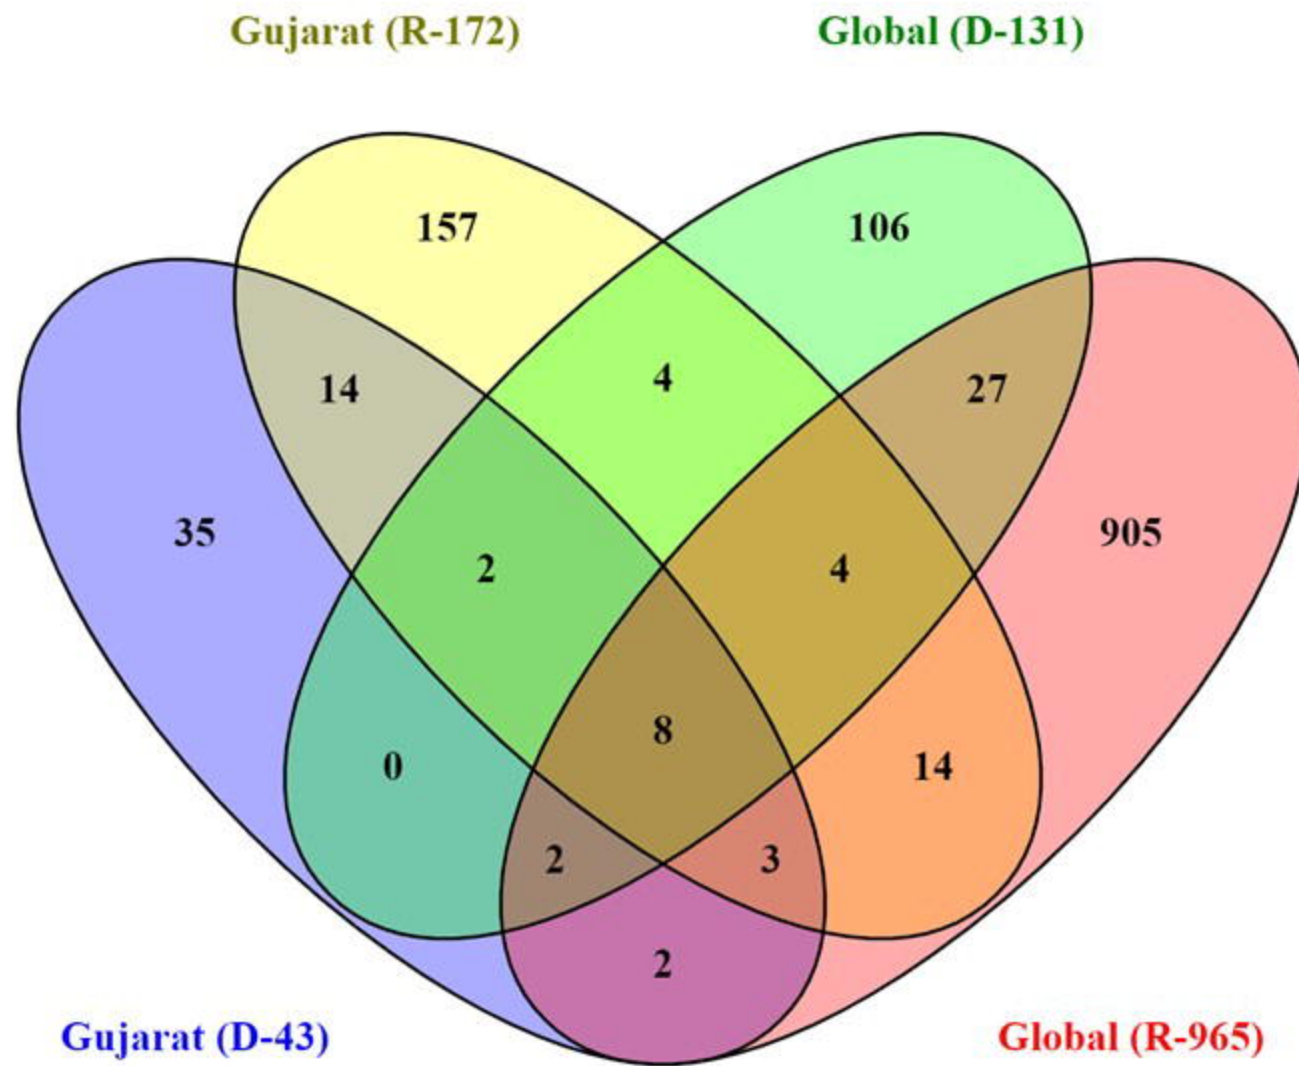

Source: http://biorxiv.org/content/10.1101/2020.07.10.197095v2.full.pdf
